# Supplementary material
Source: publisher site journal article supplement (https://www.dovepress.com/article/405621)

**Table S1. Kaplan‐Meier analysis with log-rank test of clinical variables in GSE14520**

| **Variables** |  | **Patients** |  |  | **OS** |  |
| --- | --- | --- | --- | --- | --- | --- |
| **No. of deaths** | **MST (months)** | **HR (95%CI)** | **Log-Rank p** |
| **Age(>/<=60years)** | Low | 175 | 69 | 51.4 | Ref.  0.864(.0478-1.564) | 0.629 |
| High | 37 | 13 | 53.5 |
| **Gender** | Male | 183 | 74 | 51.6 | Ref.  0.587（0.283-1.218） | 0.148 |
| Female | 29 | 8 | 55.2 |
| **HBV viral status** | CC | 156 | 57 | 53.0 | Ref.  1.338(0.836-2.143) | 0.223 |
| AVR-CC | 56 | 25 | 42.5 |
| **ALT (50>=/<U/L)** | Low | 124 | 46 | 52.7 | Ref.  1.095(0.708-1.693) | 0.684 |
| High | 88 | 36 | 51.4 |
| **Tumor Size(</>=5cm) a** | Small | 137 | 46 | 53.5 | Ref.  1.975(1.274-3.06) | 0.002 |
| Large | 74 | 36 | 26.6 |
| **Multinodular** | NO | 167 | 59 | 52.9 | Ref.  1.607(0.992-2.604) | 0.052 |
| YES | 45 | 23 | 39.4 |
| **Cirrhosis** | NO | 17 | 2 | 55.2 | Ref.  4.335(1.065-17.638) | 0.025 |
| Yes | 195 | 80 | 51.3 |
| **AFP(<=/>300ng/ml) b** | Low | 115 | 39 | 52.8 | Ref.  1.546(1.002-2.385) | 0.047 |
| High | 94 | 43 | 46.6 |
| **BCLC staging** | 0 | 20 | 2 | 56.95 | Ref. |  |
| A | 143 | 48 | 53.5 | 4.119(1.001‑16.951) | 0.05 |
| B | 22 | 12 | 46.1 | 8.992(2.005‑40.320) | 0.004 |
| C | 27 | 20 | 13.6 | 18.993(4.419‑81.632) | <0.0001 |

a: Data for one patient has been lost; b: Data for three patients have been lost; OS: Overall Survival; MST: median survival time; HR: hazard ratio; 95% CI:95% confidence interval; HBV: hepatitis B virus; AVR‑CC: acute viral replication chronic carrier; CC: chronic carrier; AFP: α‑fetoprotein; BCLC: Barcelona clinic liver cancer; No.: number; Ref: reference.

**Table S2. Kaplan-Meier analysis with log-rank test of clinical variables in GSE14520**

| **Variables** | **Patients**  **(n=212)** | **1 year-RFS** | | | | | **RFS** | | | |
| --- | --- | --- | --- | --- | --- | --- | --- | --- | --- | --- |
| **No. of recurrence** | **MST**  **(months)** | | **HR (95%CI)** | **Log-Rank p** | **No. of recurrence** | **MST (months)** | **HR (95%CI)** | **Log-Rank p** |
| **Age(>/<=60years)** | | | | | | | | | | |
| Low | 175 | 39 | | NA | Ref. | 0.219 | 96 | 45.9 | Ref. | 0.916 |
| High | 37 | 12 | | NA | 1.496(0.783-2.857) | 20 | 48.0 | 0.974(0.602-1.578) |
| **Gender** | | | | | | | | | | |
| Male | 183 | 48 | | NA | 2.869(0.894-9.212) | 0.063 | 106 | 40.1 | Ref. | 0.018 |
| Female | 29 | 3 | | NA | Ref. | 10 | NA | 0.467 (0.244-0.893) |
| **HBV viral status** | | | | | | | | | | |
| CC | 156 | 57 | | NA | Ref. | 0.585 | 81 | 28.8 | Ref. | 0.156 |
| AVR-CC | 56 | 15 | | NA | 0.846(0.463-1.545) | 35 | 51.1 | 1.331(0.895-1.979) |
| **ALT (50>=/<U/L)** | | | | | | | | | | |
| Low | 124 | 26 | | NA | Ref. | 0.218 | 63 | 53.0 | Ref. | 0.246 |
| High | 88 | 25 | | NA | 1.409(0.814-2.440) | 53 | 40.4 | 1.241(0.861-1.788) |
| **Tumor Size(</>=5cm) a** | | | | | | | | | | |
| Small | 137 | 29 | | NA | Ref. | 0.102 | 73 | 51.1 | Ref. | 0.073 |
| Large | 74 | 22 | | NA | 1.582(0.909-2.753) | 43 | 28.4 | 1.409(0.966-2.056) |
| **Multinodular** | | | | | | | | | | |
| NO | 167 | 42 | | NA | Ref. | 0.533 | 90 | 49.1 | Ref. | 0.381 |
| YES | 45 | 9 | | NA | 0.796(0.388-1.635) | 26 | 28.7 | 1.216(0.785-1.883) |
| **Cirrhosis** | | | | | | | | | | |
| NO | 17 | 0 | | NA | Ref. | 0.023 | 5 | NA | Ref. | 0.029 |
| Yes | 195 | 51 | | NA | 4.335(1.065-17.638) | 111 | 37.9 | 2.612(1.066-6.402) |
| **AFP(<=/>300ng/ml) b** | | | | | | | | | | |
| Low | 115 | 22 | | NA | Ref. | 0.039 | 62 | 48.00 | Ref. | 0.327 |
| High | 94 | 29 | | NA | 1.777(1.021-3.094) | 54 | 35.20 | 1.200(0.833-1.728) |
| **BCLC staging** | | | | | | | | | | |
| 0 | 20 | 2 | | NA | Ref. |  | 6 | NA | Ref. | <0.0001 |
| A | 143 | 30 | | NA | 2.296(0.549‑9.608) | 0.255 | 74 | 51.60 | 2.050(0.892-4.711) | 0.091 |
| B | 22 | 4 | | NA | 2.142(0.392‑11.696) | 0.379 | 15 | 26.90 | 4.019(1.550-10.421) | 0.004 |
| C | 27 | 15 | | NA | 8.695(1.987‑38.053) | <0.0001 | 21 | 8.90 | 6.163(2.477-15.333) | <0.0001 |
| **BCLC staging** | | | | | | | | | | |
| 0+A | 163 | 32 | | NA | Ref. | 0.001 | 80 | 57.7 | Ref. | <0.0001 |
| B+C | 49 | 19 | | NA | 2.487(1.409-4.390) | 36 | 19.2 | 2.654(1.775-3.969) |

a: Data for one patient has been lost; b: Data for three patients have been lost; OS: Overall Survival; MST: median survival time; HR: hazard ratio; 95% CI:95% confidence interval; HBV: hepatitis B virus; AVR‑CC: acute viral replication chronic carrier; CC: chronic carrier; AFP: α‑fetoprotein; BCLC: Barcelona Clinic Liver Cancer; No.: number; Ref: reference; NA: not available, RFS: Recurrence free survival.

**Table S3. Kaplan-Meier analysis with log-rank test of clinical variables in TCGA cohort**

| **Variables** |  | **Patients**  **(n=370)** |  |  | **OS** |  |
| --- | --- | --- | --- | --- | --- | --- |
| **No. of deaths** | **MST (days)** | **HR (95%CI)** | **Log-rank p** |
| **Age(year)** | ≤60 | 177 | 55 | 2532 | Ref. | 0.216 |
| >60 | 193 | 75 | 1622 | 1.246 (0.879‑1.766) |
| **Gender** | Male | 249 | 79 | 2486 | Ref. | 0.262 |
| Female | 121 | 51 | 1490 | 0.817(0.573-1.164) |
| **Child-Pugh a** | A | 216 | 59 | 2542 | Ref. | 0.184 |
| B+C | 22 | 9 | 1005 | 1.614 (0.796‑3.270) |
| **AFP (ng/ml) b** | ≤400 | 213 | 62 | 2456 | Ref. | 0.832 |
| >400 | 64 | 22 | 2486 | 1.055 (0.645‑1.724) |
| **Alcohol history c** | NO | 234 | 84 | 1694 | Ref. | 0.896 |
| YES | 117 | 40 | 1624 | 1.026 (0.703‑1.496) |
| **Radical resection d** | R0 | 323 | 110 | 1875 | Ref. | 0.006 |
| R1 + R2 + RX | 40 | 17 | 837 | 2.030 (1.213‑3.395) |
| **Vascular invasion e** | N0 | 206 | 60 | 2131 | Ref. | 0.155 |
| Yes | 108 | 36 | 2486 | 1.351 (0.892‑2.047) |
| **Histological grade f** | G1+G2 | 232 | 78 | 1791 | Ref. | 0.541 |
| G3+G4 | 133 | 48 | 1622 | 1.119(0.780-1.604) |
| **TMN staging g** | I | 171 | 42 | 2532 | Ref. |  |
| II | 85 | 26 | 1852 | 1.427(0.874-2.330) | 0.155 |
| III+IV | 90 | 48 | 770 | 2.764(1.823-4.190) | <0.0001 |
| **Fibrosis Ishak score h** | 0 | 74 | 30 | 2131 | Ref. | 0.338 |
| 1+2+3+4+5+6 | 137 | 34 | NA | 0.781(0.471-1.296) |
| **HBV** **infection i** | No | 247 | 104 | 1210 | Ref. | <0.0001 |
| Yes | 104 | 20 | NA | 0.357(0.221-0.578) |
| **HCV infection j** | No | 295 | 105 | 1791 | Ref. | 0.730 |
| Yes | 56 | 19 | 1229 | 1.090(0.667-1.782) |

a: Data of 132 patients have been lost; b: Data of 93 patients have been lost; c: Data of 19 patients have been lost; d: Data of 7 patients have been lost; e: Data of 56 patients have been lost; f: Data of 5 patients have been lost; g: Data of 24 patients have been lost; h: Data of 159 patients have been lost. i: Data of 19 patients have been lost; j: Data of 19 patients have been lost; OS: Overall Survival; No. of event: number of dead patients; MST: median survival time; HR: hazard ratio; 95% CI:95% confidence interval; Ref: reference; No.: number; NA: not available.

**Table S4. Kaplan-Meier analysis with log-rank test of clinical variables in TCGA cohort**

| **Variables** | **Patients**  **(n=318)** | **1 year-RFS** | | | | **RFS** | | | |
| --- | --- | --- | --- | --- | --- | --- | --- | --- | --- |
| **No. of events** | **MST**  **(day)** | **HR (95%CI)** | **Log-Rank p** | **No. of events** | **MST**  **(day)** | **HR (95%CI)** | **Log-Rank p** |
| **Age(>/<=60years)** | | | | | | | | | |
| ≤60 | 153 | 46 | NA | Ref. | 0.265 | 65 | 1509 | Ref. | 0.488 |
| >60 | 165 | 37 | NA | 0.782(0.507‑1.206) | 74 | 776 | 1.125(0.806-1.572) |
| **Gender** | | | | | | | | | |
| Male | 218 | 56 | NA | Ref. | 0.719 | 94 | 875 | Ref. | 0.919 |
| Female | 100 | 27 | NA | 1.088(0.687-1.722) | 45 | 893 | 1.019 (0.714-1.454) |
| **Child-Pugh a** | | | | | | | | | |
| A | 190 | 43 | NA | Ref. | 0.184 | 83 | 990 | Ref. | 0.242 |
| B+C | 16 | 6 | NA | 1.785(0.759‑4.194) | 8 | 1286 | 0.648(0.312-1.347) |
| **AFP (ng/ml) b** | | | | | | | | | |
| ≤400 | 185 | 37 | NA | Ref. | 0.052 | 77 | 912 | Ref. | 0.788 |
| >400 | 52 | 17 | NA | 1.767 (0.994‑3.139) | 21 | 1509 | 0.936(0.576-1.520) |
| **Alcohol history c** | | | | | | | | | |
| No | 200 | 49 | NA | Ref. | 0.660 | 85 | 912 | Ref. | 0.665 |
| Yes | 102 | 30 | NA | 1.107 (0.703‑1.744) | 46 | 879 | 1.083(0.756-1.552) |
| **Radical resection d** | | | | | | | | | |
| R0 | 279 | 73 | NA | Ref. | 0.350 | 121 | 912 | Ref. | 0.011 |
| R1/R2/ RX | 32 | 9 | NA | 1.391 (0.696‑2.782) | 17 | 478 | 1.916(1.149-3.193) |
| **Vascular invasion e** | | | | | | | | | |
| No | 179 | 32 | NA | Ref. | 0.036 | 64 | 1279 | Ref. | 0.028 |
| Yes | 92 | 27 | NA | 1.731 (1.037‑2.889) | 43 | 644 | 1.540(1.045-2.268) |
| **Histological grade f** | | | | | | | | | |
| G1+G2 | 203 | 47 | NA | Ref. | 0.247 | 85 | 892 | Ref. | 0.829 |
| G3+G4 | 110 | 33 | NA | 1.301(0.834-2.030) | 50 | 875 | 1.039(0.733-1.474) |
| **TMN staging g** | | | | | | | | | |
| I+II | 221 | 38 | NA | Ref. | <0.0001 | 79 | 1286 | Ref. | <0.0001 |
| III+IV | 76 | 40 | 289 | 3.880(2.483-6.063) | 49 | 289 | 2.885(2.009-4.142) |
| **Fibrosis Ishak score h** | | | | | | | | | |
| 0 | 63 | 16 | NA | Ref. | 0.560 | 30 | 893 | Ref. | 0.895 |
| 1+2+3+4+5+6 | 119 | 26 | NA | 0.831(0.446-1.549) | 55 | 828 | 1.031(0.659-1.611) |
| **HBV infection i** | | | | | | | | | |
| No | 210 | 60 | NA | Ref. | 0.099 | 99 | 598 | Ref. | 0.02 |
| Yes | 92 | 19 | NA | 0.650(0.388-1.089) | 32 | 2028 | 0.540(0.361-0.806) |
| **HBV infection j** | | | | | | | | | |
| No | 256 | 68 | NA | Ref. | 0.708 | 112 | 893 | Ref. | 0.991 |
| Yes | 46 | 11 | NA | 0.885(0.468-1.674) | 19 | 701 | 0.997(0.612-1.625) |

a: Data of 112 patients have been lost; b: Data of 81 patients have been lost; c: Data of 16 patients have been lost; d: Data of 7 patients have been lost; e: Data of 47 patients have been lost; f: Data of 5 patients have been lost; g: Data of 21 patients have been lost; h: Data of 136 patients have been lost. i: Data of 16 patients have been lost; j: Data of 16 patients have been lost; OS: Overall Survival; No. of event: number of dead patients; MST: median survival time; HR: hazard ratio; 95% CI:95% confidence interval; Ref: reference; No.: number; NA: not available; RFS: Recurrence free survival.

**Table S5. Joint-effect analysis in GSE14520 cohort**

| **Group** | **PUS1** | **Variable** | **Events/total** | **MST**  **(months)** | **HR (95% CI)** | **Log-Rank P** | **Adjusted HR (95% CI)** | **Adjusted p** |
| --- | --- | --- | --- | --- | --- | --- | --- | --- |
| **OS** | | | | | | | | |
| **AFP (ng/ml) a** | | | | | | | | |
| 1 | low | ≤300 | 21/69 | NA | Ref. |  | Ref. |  |
| 2 | high | ≤300 | 18/46 | NA | 0.157(0.840-2.960) | 0.157 | 1.648(0.869-3.125) | 0.126**c** |
| 3 | low | >300 | 12/36 | NA | 1.242(0.611-2.524) | 0.550 | 1.158(0.567-2.366) | 0.687**c** |
| 4 | high | >300 | 31/58 | 47.1 | 2.306(1.324-4.017) | 0.003 | 1.843(1.035-3.280) | 0.038**c** |
| **Tumor size(cm) b** | | | | | | | | |
| a | low | <5 | 22/76 | NA | Ref. |  | Ref. |  |
| b | high | <5 | 24/61 | NA | 1.607(0.901-2.868) | 0.108 | 1.390(0.772-2.502) | 0.272**d** |
| c | low | ≥5 | 11/30 | NA | 1.709(0.828-3.530) | 0.147 | 0.821(0.373-1.805) | 0.623**d** |
| d | high | ≥5 | 25/44 | 36.5 | 3.057(1.719-5.437) | 0.0001 | 1.695(0.860-3.339) | 0.127**d** |
| **BCLC staging** | | | | | | | | |
| I | low | 0+A | 22/88 | NA | Ref. |  | Ref. |  |
| II | high | 0+A | 28/75 | NA | 1.708(0.977-2.985) | 0.060 | 1.749(0.992-3.084) | 0.053**e** |
| III | low | B+C | 11/18 | 21.3 | 3.972(1.918-8.226) | 0.0002 | 3.435(1.579-7.471) | 0.002**e** |
| IV | high | B+C | 21/31 | 19.6 | 5.311(2.895-9.743) | <0.0001 | 4.197(2.131-8.267) | <0.0001**e** |
| **1 year-RFS** | | | | | | | | |
| **AFP (ng/ml) a** | | | | | | | | |
| AA | Low | ≤300 | 8/69 | NA | Ref. |  | Ref. |  |
| BB | High | ≤300 | 14/46 | NA | 3.055(1.281-7.286) | 0.012 | 3.077(1.287-7.359) | 0.012f |
| CC | Low | >300 | 6/36 | NA | 1.540(0.534-4.440) | 0.424 | 1.517(0.524-4.392) | 0.442f |
| DD | High | >300 | 23/58 | NA | 4.237(1.894-9.477) | 0.0004 | 3.369(1.479-7.673) | 0.004f |
| **BCLC staging** | | | | | | | | |
| aa | low | 0+A | 9/88 | NA | Ref. |  | Ref. |  |
| bb | high | 0+A | 23/75 | NA | 3.414(1.579-7.380) | 0.002 | 3.250(1.490-7.091) | 0.003g |
| cc | low | B+C | 5/18 | NA | 3.296(1.104-9.836) | 0.033 | 2.917(0.968-8.788) | 0.057g |
| dd | high | B+C | 14/31 | NA | 6.264(2.709-14.483) | <0.0001 | 5.001(2.105-11.882) | 0.0002g |

a: Data for 3 patients has been lost; b: Data for 1 patient have been lost; c: Adjusted by tumor size, cirrhosis, BCLC staging; d: Adjusted by cirrhosis, AFP and BCLC staging; e: Adjusted by cirrhosis, AFP and tumor size; f: adjusted by cirrhosis and BCLC staging; g: adjusted by cirrhosis and AFP; OS: overall survival; events: number of dead patients; MST: median survival time; HR: hazard ratio; 95% CI:95% confidence interval; Ref: reference; NA: not available; RFS: Recurrence free survival.

**Table S6. Joint-effect survival analysis in TCGA cohort**

| **Group** | **PUS1 expression** | **Variable** | **Events/total** | **MST**  **(days)** | **HR (95% CI)** | **Log-Rank P** | **Adjusted HR**  **(95% CI)** | **Adjusted**  **p** |
| --- | --- | --- | --- | --- | --- | --- | --- | --- |
| **1 year-RFS** | | | | | | | | |
| **TMN staginga** | | | | | | | | |
| a | low | I+II | 14/113 | NA | Ref. |  | Ref. |  |
| b | high | I+II | 24/108 | NA | 2.073(1.072-4.008) | 0.030 | 1.675(0.851-3.296) | 0.135d |
| c | low | III+IV | 16/38 | NA | 4.102(2.000-8.414) | 0.0001 | 2.512(1.092-5.779) | 0.030d |
| d | high | III+IV | 24/38 | 260 | 7.969(4.106-15.468) | <0.0001 | 7.142(3.212-15.880) | <0.0001d |
| **OS** | | | | | | | | |
| **HBV infectionb** | | | | | | | | |
| G | low | Yes | 12/59 | NA | Ref. |  | Ref. |  |
| H | high | Yes | 8/45 | NA | 0.828(0.338-2.030) | 0.680 | 0.765(0.300-1.949) | 0.575e |
| E | low | No | 48/131 | 1791 | 1.928(1.023-3.632) | 0.042 | 1.533(0.797-2.950) | 0.201e |
| F | high | No | 56/116 | 757 | 3.739(1.997-7.002) | <0.0001 | 3.168(1.662-6.036) | <0.0001e |
| **TMN stagingc** | | | | | | | | |
| A | Low | I+II | 28/125 | 2532 | Ref. |  | Ref. |  |
| B | High | I+II | 40/131 | 1694 | 3.055(1.281-7.286) | 0.034 | 1.679(1.033-2.728) | 0.037f |
| C | Low | III+IV | 21/45 | 1490 | 1.540(0.534-4.440) | 0.001 | 2.445(1.384-4.321) | 0.002f |
| D | High | III+IV | 27/45 | 556 | 4.237(1.894-9.477) | <0.0001 | 3.703(2.131-6.435) | <0.0001f |

a: Data of 21 patients have been lost; b: Data of 19 patients have been lost; c: Data of 24 patients have been lost; d: Adjusted by vascular invasion; e: Adjusted by TMN staging; f: Adjusted by radical resection and HBV infection; OS: overall survival; events: number of dead patients; MST: median survival time; HR: hazard ratio; 95% CI:95% confidence interval. Ref: reference; NA: not available; RFS: Recurrence free survival.

**Table S7. Joint-effect survival analysis in ICGC cohort**

| **Group** | **PUS1 expression** | **Variable** | **Events/total** | **MST**  **(days)** | **HR (95% CI)** | **Log-Rank P** | **Adjusted HR**  **(95% CI)** | **Adjusted**  **p** |
| --- | --- | --- | --- | --- | --- | --- | --- | --- |
| **OS** | | | | | | | | |
| **TMN staging** | | | | | | | | |
| I | Low | I+II | 9/74 | NA | Ref. |  | NA | NA |
| J | High | I+II | 10/72 | NA | 1.229(0.499-3.032) | 0.654 | NA | NA |
| K | Low | III+IV | 7/46 | NA | 1.298(0.481-3.506) | 0.607 | NA | NA |
| L | High | III+IV | 17/48 | 1260 | 4.365(1.938-9.829) | <0.0001 | NA | NA |

OS: overall survival; events: number of dead patients; MST: median survival time; HR: hazard ratio; 95% CI:95% confidence interval. Ref: reference; NA: not available.

**Table S8. Co-expressed genes of *PUS1* in TCGA cohort**

| **Gene** | **Correlation** | **p-value** | **Gene** | **Correlation** | **p-value** | **Gene** | **Correlation** | **p-value** | **Gene** | **Correlation** | **p-value** |
| --- | --- | --- | --- | --- | --- | --- | --- | --- | --- | --- | --- |
| NOC4L | 0.747 | 3.33E-67 | ELOC | 0.534 | 1.19E-28 | P2RY11 | 0.472 | 5.91E-22 | MRPL53 | 0.420 | 3.09E-17 |
| PA2G4 | 0.737 | 1.78E-64 | RPL34 | 0.533 | 1.60E-28 | SART1 | 0.472 | 6.23E-22 | COPRS | 0.420 | 3.10E-17 |
| METTL1 | 0.728 | 3.28E-62 | C19orf60 | 0.533 | 1.66E-28 | RPS15A | 0.472 | 6.25E-22 | TMEM203 | 0.419 | 3.44E-17 |
| TRMT1 | 0.712 | 1.88E-58 | SGTA | 0.533 | 1.70E-28 | TFPT | 0.472 | 6.27E-22 | GTF3C5 | 0.419 | 3.46E-17 |
| SNRPF | 0.710 | 4.65E-58 | MYL6B | 0.533 | 1.72E-28 | GEMIN6 | 0.472 | 6.53E-22 | PPP2R1A | 0.419 | 3.94E-17 |
| PPAN | 0.709 | 7.26E-58 | ZNF524 | 0.532 | 1.76E-28 | FKBP2 | 0.471 | 7.45E-22 | NAA60 | 0.419 | 3.96E-17 |
| DDX51 | 0.697 | 4.09E-55 | TIMM8B | 0.532 | 1.81E-28 | UQCR11 | 0.471 | 7.94E-22 | DBNL | 0.419 | 3.97E-17 |
| COPZ1 | 0.696 | 6.18E-55 | JMJD6 | 0.532 | 1.82E-28 | FAM96B | 0.471 | 8.43E-22 | BTBD16 | 0.419 | 3.99E-17 |
| NME1 | 0.685 | 1.70E-52 | MVD | 0.532 | 1.97E-28 | ATG4B | 0.471 | 8.56E-22 | ZNF576 | 0.419 | 4.01E-17 |
| REXO4 | 0.683 | 4.19E-52 | MZT2B | 0.532 | 2.24E-28 | ALYREF | 0.470 | 8.87E-22 | NUPR1 | 0.418 | 4.04E-17 |
| ANAPC7 | 0.681 | 1.02E-51 | IMPDH2 | 0.532 | 2.26E-28 | HDAC11 | 0.470 | 9.43E-22 | RSL1D1 | 0.418 | 4.09E-17 |
| RRP9 | 0.681 | 1.12E-51 | PRDX5 | 0.531 | 2.80E-28 | MRPL48 | 0.470 | 1.01E-21 | ZDHHC12 | 0.418 | 4.23E-17 |
| DDX54 | 0.677 | 5.40E-51 | MRPL27 | 0.531 | 2.85E-28 | WRAP53 | 0.470 | 1.02E-21 | DHX30 | 0.418 | 4.37E-17 |
| RPL35 | 0.677 | 5.50E-51 | COX6B1 | 0.531 | 2.91E-28 | TRAPPC1 | 0.470 | 1.02E-21 | DAPK3 | 0.418 | 4.40E-17 |
| DAZAP1 | 0.675 | 1.71E-50 | MRPL14 | 0.531 | 2.98E-28 | PPP1R16A | 0.470 | 1.03E-21 | SWSAP1 | 0.418 | 4.49E-17 |
| DHX37 | 0.673 | 3.40E-50 | RPL11 | 0.530 | 3.40E-28 | OGFR | 0.470 | 1.04E-21 | MED22 | 0.418 | 4.55E-17 |
| RRP1 | 0.673 | 3.64E-50 | IRF3 | 0.530 | 3.51E-28 | UBE2F | 0.470 | 1.04E-21 | TBC1D13 | 0.418 | 4.65E-17 |
| ARPC3 | 0.672 | 4.94E-50 | TPRN | 0.530 | 3.86E-28 | SIL1 | 0.470 | 1.05E-21 | ALKBH2 | 0.417 | 5.10E-17 |
| PGAM5 | 0.669 | 2.48E-49 | RPL5 | 0.530 | 3.88E-28 | LONP1 | 0.470 | 1.06E-21 | ZAN | 0.417 | 5.26E-17 |
| RRP12 | 0.668 | 2.96E-49 | NCBP2.AS2 | 0.529 | 4.08E-28 | BRI3 | 0.469 | 1.27E-21 | PPP1CA | 0.417 | 5.50E-17 |
| NOP16 | 0.667 | 5.50E-49 | MRPL23 | 0.529 | 4.17E-28 | NR2F6 | 0.469 | 1.29E-21 | NUDT2 | 0.417 | 5.55E-17 |
| ARL6IP4 | 0.661 | 8.27E-48 | PIK3R2 | 0.529 | 4.60E-28 | CLIC1 | 0.468 | 1.39E-21 | UBE2R2 | 0.417 | 5.83E-17 |
| GADD45GIP1 | 0.661 | 9.56E-48 | DUS2 | 0.529 | 4.67E-28 | C19orf70 | 0.468 | 1.57E-21 | CENPB | 0.416 | 5.88E-17 |
| PTGES2 | 0.660 | 1.33E-47 | COX19 | 0.529 | 4.81E-28 | PDCD5 | 0.468 | 1.58E-21 | SLC35C2 | 0.416 | 6.22E-17 |
| C19orf24 | 0.658 | 2.82E-47 | NME3 | 0.528 | 5.30E-28 | SLC26A6 | 0.468 | 1.62E-21 | IDH3G | 0.416 | 6.69E-17 |
| LSM7 | 0.657 | 4.40E-47 | PSMB7 | 0.528 | 5.32E-28 | ERAL1 | 0.468 | 1.63E-21 | COMMD3 | 0.416 | 6.76E-17 |
| RPL6 | 0.656 | 5.81E-47 | ISY1 | 0.528 | 5.70E-28 | ARMC7 | 0.468 | 1.68E-21 | APOA2 | 0.416 | 6.96E-17 |
| RPS15 | 0.655 | 9.45E-47 | TALDO1 | 0.528 | 5.98E-28 | TXNRD2 | 0.468 | 1.70E-21 | NQO1 | 0.416 | 7.06E-17 |
| IMP4 | 0.654 | 1.44E-46 | FBXL6 | 0.528 | 6.25E-28 | KIF9 | 0.468 | 1.71E-21 | RHOG | 0.415 | 7.38E-17 |
| CLTA | 0.654 | 1.69E-46 | PTRH2 | 0.528 | 6.65E-28 | SMG5 | 0.467 | 1.87E-21 | SLC12A5 | 0.415 | 7.40E-17 |
| POP5 | 0.653 | 2.17E-46 | ERP29 | 0.527 | 7.22E-28 | AC011448.1 | 0.467 | 1.91E-21 | MED16 | 0.415 | 7.43E-17 |
| BOP1 | 0.653 | 2.54E-46 | SNRPE | 0.527 | 7.34E-28 | RPP25L | 0.467 | 1.92E-21 | CCT6A | 0.415 | 8.31E-17 |
| DPM2 | 0.652 | 3.48E-46 | CCT7 | 0.527 | 8.44E-28 | PMPCA | 0.467 | 1.93E-21 | RBM22 | 0.415 | 8.49E-17 |
| EIF3B | 0.652 | 4.05E-46 | RPS26 | 0.527 | 8.49E-28 | DNTTIP1 | 0.467 | 1.98E-21 | THAP3 | 0.414 | 8.62E-17 |
| C12orf73 | 0.651 | 4.72E-46 | COMTD1 | 0.526 | 9.13E-28 | CHTOP | 0.467 | 1.99E-21 | PSMA1 | 0.414 | 8.97E-17 |
| PPP1R35 | 0.651 | 4.81E-46 | AP2S1 | 0.526 | 9.20E-28 | SAMD1 | 0.467 | 2.05E-21 | TMEM141 | 0.414 | 9.12E-17 |
| RPL37 | 0.651 | 6.75E-46 | C8orf82 | 0.526 | 9.23E-28 | PRKRIP1 | 0.467 | 2.07E-21 | MANF | 0.414 | 9.32E-17 |
| PUSL1 | 0.651 | 6.90E-46 | MMAB | 0.526 | 9.34E-28 | ZNF580 | 0.467 | 2.10E-21 | PSMA5 | 0.414 | 9.56E-17 |
| DDX56 | 0.650 | 8.55E-46 | RECQL4 | 0.526 | 9.76E-28 | BRK1 | 0.467 | 2.14E-21 | SYNGR2 | 0.414 | 9.57E-17 |
| ARPC5L | 0.648 | 1.68E-45 | MANBAL | 0.526 | 1.01E-27 | TMSB10 | 0.466 | 2.25E-21 | AFP | 0.414 | 9.87E-17 |
| SURF2 | 0.646 | 4.88E-45 | CDC34 | 0.525 | 1.25E-27 | PLEKHJ1 | 0.466 | 2.29E-21 | BTF3 | 0.414 | 9.99E-17 |
| ARPC4 | 0.642 | 2.45E-44 | RPF2 | 0.525 | 1.26E-27 | CAMSAP3 | 0.466 | 2.33E-21 | NOL12 | 0.413 | 1.07E-16 |
| SNRPA | 0.641 | 3.36E-44 | UBA52 | 0.525 | 1.33E-27 | EGLN2 | 0.466 | 2.55E-21 | UQCRC1 | 0.413 | 1.12E-16 |
| IPO4 | 0.639 | 6.67E-44 | NUDT1 | 0.525 | 1.42E-27 | TOM1 | 0.466 | 2.60E-21 | C14orf119 | 0.413 | 1.17E-16 |
| ATIC | 0.638 | 9.50E-44 | COPS9 | 0.524 | 1.58E-27 | EIF3K | 0.465 | 2.82E-21 | ATP5L | 0.413 | 1.19E-16 |
| FDX2 | 0.638 | 1.16E-43 | ITIH4 | 0.524 | 1.70E-27 | CD63 | 0.465 | 3.01E-21 | SDCCAG3 | 0.413 | 1.24E-16 |
| TOP1MT | 0.636 | 2.77E-43 | TMEM160 | 0.524 | 2.00E-27 | BUD31 | 0.465 | 3.08E-21 | HMGA1 | 0.412 | 1.32E-16 |
| BRMS1 | 0.633 | 8.05E-43 | SCNM1 | 0.523 | 2.21E-27 | RBX1 | 0.465 | 3.17E-21 | TUBA4A | 0.412 | 1.39E-16 |
| CD320 | 0.631 | 1.47E-42 | SF3B5 | 0.523 | 2.28E-27 | P2RX4 | 0.464 | 3.43E-21 | FIS1 | 0.412 | 1.39E-16 |
| NCLN | 0.631 | 1.83E-42 | CHCHD10 | 0.523 | 2.33E-27 | S100A16 | 0.464 | 3.50E-21 | KRT8 | 0.412 | 1.41E-16 |
| SNRNP35 | 0.631 | 1.93E-42 | NIFK | 0.523 | 2.39E-27 | EIF3D | 0.464 | 3.51E-21 | AGTRAP | 0.411 | 1.49E-16 |
| POLR2H | 0.629 | 3.60E-42 | PCBP4 | 0.522 | 2.64E-27 | FLAD1 | 0.464 | 3.86E-21 | STX4 | 0.411 | 1.50E-16 |
| EXOSC7 | 0.628 | 5.16E-42 | EXOSC5 | 0.522 | 2.67E-27 | RALY | 0.464 | 3.97E-21 | IMP3 | 0.411 | 1.52E-16 |
| TMEM120B | 0.628 | 5.32E-42 | MAN1B1 | 0.522 | 2.86E-27 | BRIX1 | 0.463 | 4.26E-21 | NMRAL1 | 0.411 | 1.53E-16 |
| ATP5G2 | 0.626 | 1.21E-41 | PIH1D1 | 0.522 | 3.00E-27 | RPS16 | 0.463 | 4.74E-21 | TMEM250 | 0.411 | 1.55E-16 |
| NT5C | 0.626 | 1.29E-41 | TIMM44 | 0.522 | 3.40E-27 | EEF1B2 | 0.463 | 4.80E-21 | CST3 | 0.411 | 1.57E-16 |
| TRMU | 0.626 | 1.38E-41 | TIMM9 | 0.521 | 3.47E-27 | GOLT1A | 0.463 | 4.82E-21 | TMEM189 | 0.411 | 1.59E-16 |
| RPL38 | 0.625 | 1.61E-41 | ELOF1 | 0.521 | 3.59E-27 | TMEM147 | 0.463 | 4.94E-21 | MAGIX | 0.411 | 1.64E-16 |
| C9orf142 | 0.625 | 1.94E-41 | SMIM27 | 0.521 | 3.87E-27 | CHCHD2 | 0.463 | 5.16E-21 | TSEN34 | 0.411 | 1.67E-16 |
| SNU13 | 0.623 | 4.20E-41 | BAX | 0.521 | 3.97E-27 | RPS27A | 0.462 | 5.23E-21 | HCRT | 0.410 | 1.79E-16 |
| JPT1 | 0.623 | 4.41E-41 | MPST | 0.521 | 4.14E-27 | INO80B | 0.462 | 5.23E-21 | RPS12 | 0.410 | 1.88E-16 |
| TBRG4 | 0.623 | 4.45E-41 | LSM10 | 0.521 | 4.14E-27 | STYXL1 | 0.462 | 5.29E-21 | ALKBH4 | 0.410 | 1.95E-16 |
| EIF5A | 0.622 | 4.92E-41 | RANGRF | 0.520 | 4.52E-27 | PDCD2L | 0.462 | 5.34E-21 | SIPA1 | 0.410 | 1.96E-16 |
| NDUFB9 | 0.621 | 7.58E-41 | MZT2A | 0.520 | 4.64E-27 | CINP | 0.462 | 5.42E-21 | WDYHV1 | 0.410 | 1.96E-16 |
| MCRS1 | 0.621 | 8.82E-41 | ANAPC11 | 0.520 | 4.64E-27 | PAM16 | 0.462 | 5.79E-21 | RTN4IP1 | 0.410 | 2.00E-16 |
| RPL18 | 0.619 | 1.38E-40 | SEM1 | 0.520 | 4.78E-27 | SLC25A39 | 0.462 | 5.81E-21 | TMEM222 | 0.410 | 2.03E-16 |
| CCDC12 | 0.618 | 2.11E-40 | RPS7 | 0.520 | 4.87E-27 | FAM207A | 0.462 | 5.98E-21 | CFAP100 | 0.410 | 2.04E-16 |
| CCDC137 | 0.618 | 2.11E-40 | TRAPPC2L | 0.520 | 4.95E-27 | KIAA0930 | 0.461 | 6.95E-21 | COX8A | 0.410 | 2.08E-16 |
| VPS33A | 0.617 | 3.30E-40 | ZACN | 0.520 | 5.17E-27 | EEF1D | 0.461 | 7.14E-21 | NDUFA6 | 0.409 | 2.22E-16 |
| RPS9 | 0.617 | 3.41E-40 | SWI5 | 0.520 | 5.17E-27 | MTG2 | 0.461 | 7.33E-21 | AAAS | 0.409 | 2.22E-16 |
| RPL36 | 0.616 | 4.65E-40 | UBE2L3 | 0.520 | 5.26E-27 | POLR1E | 0.461 | 7.50E-21 | CHMP1A | 0.409 | 2.23E-16 |
| RNF126 | 0.615 | 6.13E-40 | MRPS21 | 0.520 | 5.36E-27 | MRPL4 | 0.461 | 7.65E-21 | ELP6 | 0.409 | 2.26E-16 |
| ZHX1.C8orf76 | 0.615 | 7.48E-40 | HIGD2A | 0.520 | 5.56E-27 | MINDY4 | 0.461 | 7.74E-21 | TMEM101 | 0.409 | 2.33E-16 |
| SSNA1 | 0.615 | 7.97E-40 | RPUSD1 | 0.520 | 5.80E-27 | DDA1 | 0.461 | 7.79E-21 | P2RY6 | 0.409 | 2.33E-16 |
| EMG1 | 0.615 | 8.28E-40 | BUD23 | 0.519 | 6.01E-27 | TPI1 | 0.461 | 7.81E-21 | NDUFV2 | 0.409 | 2.41E-16 |
| MRTO4 | 0.614 | 1.14E-39 | GATC | 0.519 | 6.46E-27 | PFDN6 | 0.460 | 8.36E-21 | NAPRT | 0.409 | 2.43E-16 |
| RITA1 | 0.614 | 1.18E-39 | C1orf35 | 0.519 | 7.05E-27 | RPL15 | 0.460 | 8.37E-21 | TXN2 | 0.409 | 2.44E-16 |
| PPP1R14B | 0.613 | 1.50E-39 | ZNF581 | 0.519 | 7.38E-27 | AIFM2 | 0.460 | 8.60E-21 | POLE4 | 0.409 | 2.46E-16 |
| ITPA | 0.613 | 1.76E-39 | GGCT | 0.519 | 7.42E-27 | CHRAC1 | 0.460 | 8.71E-21 | STX8 | 0.408 | 2.62E-16 |
| RRP7A | 0.612 | 1.86E-39 | DYNLRB1 | 0.518 | 7.70E-27 | SLIRP | 0.460 | 8.91E-21 | C9orf16 | 0.408 | 2.66E-16 |
| MRPL52 | 0.612 | 2.11E-39 | DCAF13 | 0.518 | 7.88E-27 | RPL21 | 0.460 | 9.05E-21 | VPS4A | 0.408 | 2.67E-16 |
| PQBP1 | 0.611 | 2.87E-39 | BLOC1S1 | 0.518 | 7.98E-27 | CHMP2A | 0.460 | 9.16E-21 | PLEKHA4 | 0.408 | 2.72E-16 |
| PES1 | 0.611 | 3.02E-39 | B3GAT3 | 0.518 | 8.10E-27 | AATF | 0.460 | 9.16E-21 | RNF220 | 0.408 | 2.87E-16 |
| RPS2 | 0.610 | 3.68E-39 | FAU | 0.518 | 9.14E-27 | PSMA4 | 0.460 | 9.34E-21 | RASSF1 | 0.408 | 2.87E-16 |
| SIRT6 | 0.610 | 4.06E-39 | DTYMK | 0.518 | 9.56E-27 | COA3 | 0.460 | 9.44E-21 | WDR70 | 0.408 | 2.90E-16 |
| EDF1 | 0.610 | 4.47E-39 | SFXN4 | 0.518 | 9.79E-27 | MRPL41 | 0.459 | 1.14E-20 | AURKB | 0.408 | 2.91E-16 |
| SNRPD1 | 0.610 | 4.81E-39 | FBRSL1 | 0.517 | 1.05E-26 | KRT10 | 0.459 | 1.15E-20 | LYRM4 | 0.408 | 2.96E-16 |
| ARFGAP1 | 0.609 | 5.42E-39 | TRAF4 | 0.517 | 1.07E-26 | SPATC1L | 0.458 | 1.30E-20 | MESP1 | 0.408 | 2.98E-16 |
| RFXANK | 0.609 | 6.66E-39 | FKBP4 | 0.517 | 1.10E-26 | ZMAT5 | 0.458 | 1.31E-20 | CSTB | 0.408 | 3.07E-16 |
| MAP2K2 | 0.609 | 7.32E-39 | TATDN2 | 0.516 | 1.35E-26 | SPRN | 0.458 | 1.32E-20 | NDUFB10 | 0.407 | 3.16E-16 |
| ATF4 | 0.609 | 7.39E-39 | SRP19 | 0.516 | 1.41E-26 | CCDC183 | 0.458 | 1.33E-20 | PTPA | 0.407 | 3.17E-16 |
| RPLP0 | 0.608 | 7.78E-39 | PPIH | 0.516 | 1.42E-26 | EXOSC8 | 0.458 | 1.33E-20 | AUP1 | 0.407 | 3.26E-16 |
| EXOSC4 | 0.608 | 7.82E-39 | PWP1 | 0.515 | 1.76E-26 | SFSWAP | 0.458 | 1.35E-20 | PRR5 | 0.407 | 3.43E-16 |
| STX10 | 0.607 | 1.12E-38 | C19orf25 | 0.515 | 1.77E-26 | NDUFS5 | 0.458 | 1.36E-20 | ADSL | 0.407 | 3.45E-16 |
| RPS14 | 0.607 | 1.19E-38 | GPATCH3 | 0.515 | 1.77E-26 | COMMD6 | 0.458 | 1.51E-20 | DNAJB12 | 0.406 | 3.75E-16 |
| RACK1 | 0.607 | 1.51E-38 | CCDC58 | 0.515 | 1.88E-26 | METTL5 | 0.457 | 1.58E-20 | EIF2B4 | 0.406 | 3.89E-16 |
| MRPS2 | 0.606 | 1.61E-38 | DMAP1 | 0.515 | 2.08E-26 | NAXE | 0.457 | 1.64E-20 | CHCHD4 | 0.406 | 3.96E-16 |
| ALG3 | 0.606 | 1.80E-38 | RBM10 | 0.514 | 2.15E-26 | TUBB4B | 0.457 | 1.72E-20 | RFC2 | 0.406 | 4.05E-16 |
| URM1 | 0.606 | 1.91E-38 | SARNP | 0.514 | 2.31E-26 | APOPT1 | 0.457 | 1.72E-20 | ATP6V0E1 | 0.406 | 4.12E-16 |
| RPL24 | 0.606 | 2.05E-38 | H2AFX | 0.514 | 2.39E-26 | EIF2B5 | 0.457 | 1.88E-20 | TTC1 | 0.406 | 4.17E-16 |
| YDJC | 0.605 | 2.30E-38 | EIF2B1 | 0.514 | 2.44E-26 | RPS3A | 0.456 | 2.02E-20 | SUPT5H | 0.406 | 4.24E-16 |
| JMJD4 | 0.605 | 2.58E-38 | SNRPG | 0.514 | 2.73E-26 | MYBL2 | 0.456 | 2.10E-20 | LSM2 | 0.406 | 4.30E-16 |
| KMT5A | 0.604 | 3.34E-38 | ATAD3B | 0.513 | 2.91E-26 | NDUFS8 | 0.456 | 2.15E-20 | COG4 | 0.406 | 4.43E-16 |
| DPH7 | 0.603 | 5.41E-38 | MRPS9 | 0.513 | 2.91E-26 | MBLAC1 | 0.456 | 2.27E-20 | SLC25A3 | 0.405 | 4.58E-16 |
| RPL32 | 0.603 | 6.00E-38 | RPS3 | 0.513 | 2.97E-26 | PRMT1 | 0.455 | 2.43E-20 | TFAP4 | 0.405 | 4.71E-16 |
| SNRPB | 0.602 | 7.19E-38 | TSEN54 | 0.513 | 2.99E-26 | ORMDL2 | 0.455 | 2.55E-20 | EMC3 | 0.405 | 4.73E-16 |
| RPSA | 0.602 | 7.38E-38 | DPM3 | 0.512 | 3.84E-26 | C12orf45 | 0.455 | 2.68E-20 | UBXN11 | 0.405 | 4.74E-16 |
| RPL8 | 0.602 | 7.72E-38 | MRM3 | 0.512 | 4.10E-26 | CLN3 | 0.455 | 2.71E-20 | TMEM219 | 0.405 | 4.79E-16 |
| RPL12 | 0.602 | 8.04E-38 | ZNF444 | 0.512 | 4.24E-26 | TP53RK | 0.455 | 2.72E-20 | MSH5.SAPCD1 | 0.405 | 4.80E-16 |
| RPL28 | 0.601 | 9.46E-38 | TWNK | 0.511 | 4.97E-26 | CENPM | 0.455 | 2.78E-20 | DGCR14 | 0.405 | 4.98E-16 |
| HGH1 | 0.601 | 1.08E-37 | ZP3 | 0.511 | 5.30E-26 | TRIM11 | 0.455 | 2.83E-20 | EWSR1 | 0.405 | 5.05E-16 |
| PUF60 | 0.601 | 1.15E-37 | SRRT | 0.511 | 5.79E-26 | EIF3M | 0.455 | 2.84E-20 | COX7C | 0.405 | 5.25E-16 |
| TSSC4 | 0.601 | 1.21E-37 | TIMM17B | 0.511 | 5.98E-26 | CKS2 | 0.454 | 3.09E-20 | UTP11 | 0.405 | 5.28E-16 |
| ADRM1 | 0.601 | 1.24E-37 | RBM34 | 0.510 | 6.21E-26 | RPS27 | 0.454 | 3.13E-20 | CDK10 | 0.404 | 5.70E-16 |
| MRGBP | 0.600 | 1.38E-37 | PQLC2 | 0.510 | 6.21E-26 | EIF3I | 0.454 | 3.38E-20 | NDUFA8 | 0.404 | 5.72E-16 |
| SRM | 0.600 | 1.53E-37 | RPS11 | 0.510 | 6.27E-26 | GPAA1 | 0.454 | 3.39E-20 | LIN7B | 0.404 | 5.84E-16 |
| PGLS | 0.599 | 2.45E-37 | FAM83H | 0.510 | 7.03E-26 | RPUSD3 | 0.453 | 3.66E-20 | POLR2K | 0.404 | 6.22E-16 |
| PSMG3 | 0.597 | 4.32E-37 | UBXN1 | 0.510 | 7.28E-26 | TRIM65 | 0.453 | 4.22E-20 | WDR97 | 0.403 | 6.43E-16 |
| SAC3D1 | 0.596 | 5.30E-37 | COMMD4 | 0.510 | 7.77E-26 | MCRIP1 | 0.453 | 4.33E-20 | SMIM7 | 0.403 | 6.55E-16 |
| MRPL12 | 0.595 | 7.97E-37 | NR2C2AP | 0.509 | 8.21E-26 | B4GALT7 | 0.452 | 4.49E-20 | PSMC4 | 0.403 | 6.55E-16 |
| UBE2M | 0.595 | 8.63E-37 | RRP8 | 0.509 | 9.42E-26 | TSTA3 | 0.452 | 4.59E-20 | CBWD6 | 0.403 | 6.74E-16 |
| UBE2S | 0.594 | 1.08E-36 | RPS17 | 0.509 | 9.70E-26 | RNF181 | 0.452 | 4.69E-20 | UQCRQ | 0.403 | 6.75E-16 |
| CNPY2 | 0.592 | 2.38E-36 | ZNRD1 | 0.509 | 1.00E-25 | TRIB3 | 0.452 | 4.71E-20 | UPK3BL1 | 0.403 | 6.86E-16 |
| GTF3A | 0.592 | 2.61E-36 | C18orf21 | 0.508 | 1.07E-25 | LYAR | 0.452 | 4.82E-20 | GTPBP6 | 0.403 | 7.02E-16 |
| ROMO1 | 0.592 | 2.70E-36 | PFN1 | 0.508 | 1.07E-25 | RPP30 | 0.452 | 4.83E-20 | RIPK2 | 0.403 | 7.30E-16 |
| COMMD5 | 0.590 | 4.19E-36 | RBCK1 | 0.508 | 1.08E-25 | ATG7 | 0.452 | 5.01E-20 | HDGF | 0.403 | 7.48E-16 |
| GRWD1 | 0.590 | 4.65E-36 | POLR2L | 0.508 | 1.13E-25 | C1QBP | 0.452 | 5.39E-20 | MRPL37 | 0.403 | 7.64E-16 |
| PPIA | 0.590 | 5.15E-36 | UBL5 | 0.508 | 1.17E-25 | FAM109A | 0.451 | 5.78E-20 | CLASRP | 0.403 | 7.66E-16 |
| RPLP2 | 0.590 | 5.33E-36 | RPL27 | 0.508 | 1.18E-25 | ANKHD1.EIF4EBP3 | 0.451 | 6.09E-20 | DDX39A | 0.402 | 8.10E-16 |
| LLPH | 0.588 | 9.34E-36 | CORO7 | 0.507 | 1.32E-25 | BID | 0.451 | 6.27E-20 | NT5C3B | 0.402 | 8.13E-16 |
| SHARPIN | 0.588 | 9.37E-36 | MTFP1 | 0.507 | 1.44E-25 | TMEM208 | 0.451 | 6.54E-20 | PABPC1 | 0.402 | 8.17E-16 |
| NDUFS6 | 0.588 | 1.03E-35 | AKAP8L | 0.507 | 1.45E-25 | SAP30BP | 0.451 | 6.80E-20 | GLTP | 0.402 | 8.31E-16 |
| HM13 | 0.587 | 1.18E-35 | MTHFD1L | 0.507 | 1.45E-25 | GTF2F2 | 0.450 | 7.25E-20 | TIMM23 | 0.402 | 8.36E-16 |
| SEC61G | 0.587 | 1.33E-35 | UQCRB | 0.507 | 1.53E-25 | JUND | 0.450 | 8.10E-20 | ZNF446 | 0.402 | 8.77E-16 |
| TCOF1 | 0.586 | 1.51E-35 | CHCHD5 | 0.507 | 1.55E-25 | POLR2E | 0.450 | 8.20E-20 | PEX16 | 0.402 | 8.79E-16 |
| STOML2 | 0.586 | 1.52E-35 | HSBP1L1 | 0.507 | 1.56E-25 | AIP | 0.450 | 8.26E-20 | RHOT2 | 0.402 | 8.85E-16 |
| PHPT1 | 0.586 | 1.68E-35 | C7orf50 | 0.506 | 1.71E-25 | LAMTOR2 | 0.450 | 8.36E-20 | CHST13 | 0.402 | 9.03E-16 |
| DHX34 | 0.586 | 1.68E-35 | PMF1 | 0.506 | 1.72E-25 | RPL9 | 0.450 | 8.38E-20 | UFD1 | 0.402 | 9.03E-16 |
| TUSC2 | 0.585 | 2.06E-35 | C8orf33 | 0.506 | 1.75E-25 | KARS | 0.449 | 8.81E-20 | VPS16 | 0.402 | 9.09E-16 |
| NDUFAF2 | 0.585 | 2.22E-35 | ZBTB8OS | 0.506 | 1.84E-25 | ZFAND2A | 0.448 | 1.04E-19 | FAM173A | 0.401 | 9.50E-16 |
| NACA | 0.585 | 2.29E-35 | RPL22L1 | 0.506 | 1.87E-25 | TADA3 | 0.448 | 1.07E-19 | RPS18 | 0.401 | 9.51E-16 |
| SARS2 | 0.585 | 2.47E-35 | MRPS30 | 0.506 | 1.91E-25 | ERGIC3 | 0.448 | 1.10E-19 | SNRPB2 | 0.401 | 9.71E-16 |
| MCAT | 0.584 | 3.07E-35 | MSTO1 | 0.506 | 1.92E-25 | DUSP23 | 0.448 | 1.16E-19 | EXOSC2 | 0.401 | 9.95E-16 |
| OXLD1 | 0.583 | 3.96E-35 | RPS10 | 0.506 | 1.96E-25 | MIEN1 | 0.448 | 1.20E-19 | PAFAH1B3 | 0.401 | 1.01E-15 |
| POP7 | 0.583 | 4.25E-35 | RPL31 | 0.506 | 2.02E-25 | NDUFA9 | 0.448 | 1.25E-19 | ATP5H | 0.401 | 1.09E-15 |
| ZNF787 | 0.583 | 4.29E-35 | COX6A1 | 0.506 | 2.03E-25 | FBL | 0.447 | 1.30E-19 | NOP53 | 0.400 | 1.10E-15 |
| PELP1 | 0.583 | 4.63E-35 | RP9 | 0.506 | 2.03E-25 | TSR3 | 0.447 | 1.33E-19 | NDUFAF3 | 0.400 | 1.11E-15 |
| PRPF31 | 0.582 | 6.12E-35 | FGFR4 | 0.506 | 2.11E-25 | DDIT3 | 0.447 | 1.34E-19 | GRK6 | 0.400 | 1.13E-15 |
| TRMT112 | 0.582 | 6.48E-35 | ADPRHL2 | 0.505 | 2.17E-25 | CXXC1 | 0.447 | 1.35E-19 | DDX41 | 0.400 | 1.18E-15 |
| WDR4 | 0.582 | 6.73E-35 | ZNF628 | 0.505 | 2.19E-25 | GNL3 | 0.447 | 1.46E-19 | TNRC6B | -0.400 | 1.16E-15 |
| PFDN5 | 0.581 | 7.48E-35 | FBXL15 | 0.505 | 2.31E-25 | SERF2 | 0.447 | 1.46E-19 | AQR | -0.400 | 1.11E-15 |
| RPL29 | 0.581 | 7.61E-35 | PPP1R7 | 0.505 | 2.36E-25 | YIF1A | 0.446 | 1.73E-19 | PHLDB2 | -0.401 | 1.09E-15 |
| LSM4 | 0.581 | 7.93E-35 | TONSL | 0.505 | 2.44E-25 | PKIB | 0.446 | 1.74E-19 | AP5M1 | -0.402 | 8.68E-16 |
| UCHL3 | 0.581 | 8.06E-35 | MRPS12 | 0.505 | 2.50E-25 | MRPL54 | 0.446 | 1.77E-19 | SIRT1 | -0.402 | 8.46E-16 |
| RBM19 | 0.581 | 8.44E-35 | GPATCH4 | 0.505 | 2.60E-25 | UFSP1 | 0.446 | 1.78E-19 | SLC35A3 | -0.402 | 8.46E-16 |
| MFSD5 | 0.581 | 9.23E-35 | SNRNP70 | 0.505 | 2.64E-25 | GEMIN7 | 0.446 | 1.83E-19 | NF1 | -0.402 | 7.83E-16 |
| GFER | 0.581 | 9.30E-35 | LMNA | 0.505 | 2.72E-25 | SPOUT1 | 0.446 | 1.91E-19 | UTP14C | -0.402 | 7.81E-16 |
| SURF6 | 0.581 | 9.72E-35 | WDR77 | 0.504 | 2.82E-25 | PSMC5 | 0.445 | 1.99E-19 | REV1 | -0.404 | 6.09E-16 |
| MIIP | 0.579 | 1.45E-34 | MFSD3 | 0.504 | 2.91E-25 | COX5B | 0.445 | 2.03E-19 | SLC24A1 | -0.404 | 6.07E-16 |
| C12orf43 | 0.579 | 1.57E-34 | CACFD1 | 0.504 | 3.03E-25 | CD2BP2 | 0.445 | 2.06E-19 | ARFGEF2 | -0.404 | 5.86E-16 |
| ZNHIT2 | 0.579 | 1.76E-34 | MRPL24 | 0.504 | 3.15E-25 | APTX | 0.445 | 2.10E-19 | SETD7 | -0.404 | 5.77E-16 |
| PTDSS2 | 0.579 | 1.82E-34 | MOB2 | 0.504 | 3.15E-25 | NEDD8 | 0.444 | 2.39E-19 | CLASP1 | -0.405 | 4.51E-16 |
| PFDN2 | 0.578 | 2.05E-34 | RPS5 | 0.504 | 3.51E-25 | LAMTOR4 | 0.444 | 2.43E-19 | CCNK | -0.405 | 4.48E-16 |
| CCT3 | 0.578 | 2.27E-34 | HDAC10 | 0.503 | 4.19E-25 | TMEM223 | 0.444 | 2.59E-19 | ZNF699 | -0.406 | 4.46E-16 |
| RPS20 | 0.578 | 2.51E-34 | USE1 | 0.503 | 4.20E-25 | GLRX3 | 0.444 | 2.65E-19 | SMAD1 | -0.406 | 4.39E-16 |
| CTU1 | 0.578 | 2.54E-34 | SAMD10 | 0.502 | 4.73E-25 | WDR83 | 0.443 | 2.94E-19 | WDR47 | -0.406 | 4.05E-16 |
| PDRG1 | 0.577 | 2.89E-34 | POLR2I | 0.501 | 6.31E-25 | PYCARD | 0.443 | 2.95E-19 | KLHL11 | -0.406 | 3.80E-16 |
| UQCC3 | 0.577 | 2.96E-34 | RASSF7 | 0.501 | 6.35E-25 | WDR34 | 0.443 | 3.03E-19 | ITGB1 | -0.406 | 3.77E-16 |
| RPL36A | 0.577 | 3.46E-34 | GOLGA3 | 0.501 | 6.67E-25 | PSMB5 | 0.443 | 3.05E-19 | ANO6 | -0.407 | 3.72E-16 |
| WASHC1 | 0.577 | 3.62E-34 | STIP1 | 0.501 | 7.23E-25 | SARS | 0.443 | 3.06E-19 | MYO18A | -0.407 | 3.55E-16 |
| AP5Z1 | 0.576 | 4.29E-34 | YIF1B | 0.500 | 7.48E-25 | YARS | 0.443 | 3.06E-19 | ARHGEF12 | -0.407 | 3.40E-16 |
| EIF6 | 0.576 | 4.57E-34 | CPSF4 | 0.500 | 8.00E-25 | FKBP8 | 0.443 | 3.09E-19 | EPS8 | -0.407 | 3.39E-16 |
| NDUFA7 | 0.576 | 4.66E-34 | PABPN1 | 0.500 | 8.93E-25 | SSR4 | 0.443 | 3.18E-19 | HEATR5A | -0.407 | 3.39E-16 |
| EIF3G | 0.576 | 4.86E-34 | CPSF1 | 0.500 | 9.07E-25 | DNAJB2 | 0.443 | 3.21E-19 | SYNE2 | -0.408 | 2.90E-16 |
| RPS28 | 0.575 | 6.43E-34 | DENR | 0.500 | 9.17E-25 | SNRPD3 | 0.443 | 3.22E-19 | USP8 | -0.409 | 2.22E-16 |
| C8orf76 | 0.574 | 7.40E-34 | PPP4C | 0.500 | 9.24E-25 | HIST2H2AC | 0.443 | 3.32E-19 | CREBL2 | -0.409 | 2.17E-16 |
| KXD1 | 0.574 | 7.43E-34 | DUS1L | 0.500 | 9.45E-25 | LCMT1 | 0.443 | 3.37E-19 | PIGK | -0.409 | 2.16E-16 |
| SLC52A2 | 0.574 | 7.73E-34 | METTL12 | 0.500 | 9.53E-25 | XAB2 | 0.443 | 3.39E-19 | DLG1 | -0.410 | 1.87E-16 |
| MED27 | 0.574 | 8.12E-34 | PRELID1 | 0.499 | 9.86E-25 | UXT | 0.443 | 3.43E-19 | ZBTB1 | -0.410 | 1.83E-16 |
| TAF10 | 0.574 | 8.95E-34 | GPR89A | 0.499 | 1.04E-24 | RNF208 | 0.443 | 3.56E-19 | BICRAL | -0.411 | 1.76E-16 |
| NANS | 0.574 | 9.35E-34 | RPS23 | 0.499 | 1.10E-24 | HSBP1 | 0.442 | 3.67E-19 | SPAG9 | -0.411 | 1.76E-16 |
| NSUN5 | 0.574 | 9.37E-34 | MPDU1 | 0.499 | 1.14E-24 | SMIM20 | 0.442 | 3.89E-19 | ERBIN | -0.411 | 1.74E-16 |
| PFDN4 | 0.573 | 1.00E-33 | CMTM7 | 0.499 | 1.14E-24 | CHMP4A | 0.442 | 4.05E-19 | KIAA0825 | -0.411 | 1.71E-16 |
| FARSB | 0.573 | 1.20E-33 | CSNK2B | 0.499 | 1.18E-24 | SLC25A1 | 0.442 | 4.09E-19 | ILK | -0.411 | 1.51E-16 |
| CTU2 | 0.573 | 1.21E-33 | RPL4 | 0.499 | 1.20E-24 | SREK1IP1 | 0.442 | 4.14E-19 | TSTD2 | -0.412 | 1.43E-16 |
| RPS19BP1 | 0.573 | 1.33E-33 | PTTG1 | 0.499 | 1.21E-24 | MRPL43 | 0.442 | 4.14E-19 | ATP13A3 | -0.412 | 1.38E-16 |
| ZMYND19 | 0.572 | 1.58E-33 | CAGE1 | 0.499 | 1.22E-24 | CYB561D2 | 0.442 | 4.18E-19 | AFF1 | -0.412 | 1.29E-16 |
| NAA10 | 0.572 | 1.60E-33 | STXBP2 | 0.499 | 1.22E-24 | BYSL | 0.442 | 4.22E-19 | B3GNT2 | -0.413 | 1.10E-16 |
| TIMM50 | 0.572 | 1.61E-33 | MRPL11 | 0.498 | 1.23E-24 | NDUFB8 | 0.442 | 4.32E-19 | ZNF770 | -0.414 | 1.00E-16 |
| NPRL2 | 0.571 | 1.93E-33 | WDR83OS | 0.498 | 1.39E-24 | TMUB1 | 0.442 | 4.33E-19 | STX17 | -0.414 | 9.92E-17 |
| BANF1 | 0.571 | 1.98E-33 | NUDC | 0.498 | 1.39E-24 | SSBP4 | 0.441 | 4.40E-19 | ARID4A | -0.414 | 9.82E-17 |
| MRPL47 | 0.571 | 2.03E-33 | AKT1S1 | 0.498 | 1.41E-24 | GPS1 | 0.441 | 4.41E-19 | ZNF654 | -0.414 | 8.90E-17 |
| NAT9 | 0.571 | 2.09E-33 | AP1M2 | 0.498 | 1.45E-24 | UROD | 0.441 | 4.59E-19 | SERINC1 | -0.415 | 7.87E-17 |
| PRR7 | 0.571 | 2.15E-33 | PYCR2 | 0.498 | 1.52E-24 | CDKN2AIPNL | 0.441 | 4.81E-19 | DOCK1 | -0.415 | 7.29E-17 |
| NOP56 | 0.570 | 2.61E-33 | GSDMD | 0.497 | 1.61E-24 | SDHAF1 | 0.441 | 5.07E-19 | CDC42BPB | -0.415 | 7.14E-17 |
| DYNLL1 | 0.570 | 2.73E-33 | USF1 | 0.497 | 1.65E-24 | TMEM161A | 0.441 | 5.15E-19 | SP2 | -0.416 | 6.82E-17 |
| NOP2 | 0.570 | 3.27E-33 | WDR18 | 0.497 | 1.76E-24 | QARS | 0.440 | 5.47E-19 | ITSN2 | -0.416 | 6.73E-17 |
| HSF1 | 0.570 | 3.33E-33 | USMG5 | 0.497 | 1.81E-24 | EMC9 | 0.440 | 5.62E-19 | TRAPPC11 | -0.416 | 6.61E-17 |
| OAZ1 | 0.569 | 3.88E-33 | TRIM28 | 0.497 | 1.90E-24 | GPX4 | 0.440 | 5.78E-19 | PTPN21 | -0.416 | 6.60E-17 |
| PIGU | 0.569 | 4.05E-33 | PLAC8L1 | 0.496 | 2.06E-24 | TIMM29 | 0.440 | 6.18E-19 | DOCK9 | -0.416 | 5.93E-17 |
| FAM136A | 0.569 | 4.12E-33 | PRKAR1B | 0.496 | 2.17E-24 | AC040162.1 | 0.440 | 6.25E-19 | MYLK | -0.417 | 5.79E-17 |
| KLHDC4 | 0.569 | 4.21E-33 | GPX2 | 0.496 | 2.25E-24 | PSMB1 | 0.439 | 7.26E-19 | CPEB2 | -0.417 | 5.54E-17 |
| MBD3 | 0.569 | 4.43E-33 | CCDC59 | 0.496 | 2.27E-24 | TELO2 | 0.439 | 7.70E-19 | REV3L | -0.417 | 5.45E-17 |
| SUPV3L1 | 0.568 | 5.52E-33 | EVA1B | 0.496 | 2.41E-24 | VOPP1 | 0.439 | 7.74E-19 | C16orf58 | -0.417 | 5.29E-17 |
| KRTCAP2 | 0.568 | 5.99E-33 | JAGN1 | 0.496 | 2.41E-24 | TXN | 0.439 | 7.78E-19 | APPBP2 | -0.418 | 4.54E-17 |
| C19orf48 | 0.568 | 6.01E-33 | TMEM258 | 0.495 | 2.57E-24 | NENF | 0.439 | 7.90E-19 | FAT4 | -0.418 | 4.36E-17 |
| PRPF19 | 0.568 | 6.34E-33 | SPIRE2 | 0.495 | 2.58E-24 | TMED9 | 0.438 | 8.21E-19 | WDR7 | -0.418 | 4.23E-17 |
| SMUG1 | 0.567 | 6.79E-33 | ATP5D | 0.495 | 2.61E-24 | EXOSC3 | 0.438 | 8.25E-19 | IREB2 | -0.419 | 3.67E-17 |
| SDHAF2 | 0.567 | 7.19E-33 | CDK5RAP1 | 0.495 | 2.93E-24 | PSMB4 | 0.438 | 8.67E-19 | RECQL | -0.419 | 3.61E-17 |
| GARS | 0.567 | 7.35E-33 | NAA38 | 0.495 | 2.99E-24 | PARL | 0.438 | 9.08E-19 | VPS13C | -0.420 | 3.25E-17 |
| HSPB1 | 0.567 | 7.79E-33 | SS18L2 | 0.495 | 3.14E-24 | RABIF | 0.438 | 9.67E-19 | MAP3K3 | -0.420 | 3.19E-17 |
| GMPPA | 0.567 | 7.90E-33 | ADCK5 | 0.494 | 3.32E-24 | BIRC5 | 0.438 | 9.82E-19 | FBXO3 | -0.420 | 3.11E-17 |
| VPS28 | 0.567 | 8.06E-33 | GNB1L | 0.494 | 3.34E-24 | NFKBIB | 0.437 | 1.00E-18 | DMXL1 | -0.421 | 2.64E-17 |
| RPLP1 | 0.566 | 8.95E-33 | PET100 | 0.494 | 3.69E-24 | GAMT | 0.437 | 1.02E-18 | PIKFYVE | -0.421 | 2.58E-17 |
| SCO2 | 0.566 | 9.02E-33 | WDR74 | 0.494 | 4.14E-24 | S100A13 | 0.437 | 1.08E-18 | KMT2C | -0.421 | 2.33E-17 |
| RAN | 0.566 | 9.31E-33 | SNRPC | 0.493 | 4.16E-24 | NSMCE1 | 0.437 | 1.08E-18 | KLHL24 | -0.421 | 2.33E-17 |
| PSMB3 | 0.566 | 1.01E-32 | SEC61B | 0.493 | 4.27E-24 | EMC8 | 0.437 | 1.12E-18 | RSF1 | -0.422 | 2.13E-17 |
| SMYD5 | 0.566 | 1.05E-32 | ECE2 | 0.493 | 4.48E-24 | ATP5EP2 | 0.437 | 1.13E-18 | HIPK1 | -0.422 | 2.05E-17 |
| EIF2S2 | 0.566 | 1.05E-32 | CHCHD1 | 0.493 | 4.54E-24 | PHB | 0.437 | 1.14E-18 | RASA1 | -0.422 | 1.90E-17 |
| BOLA2B | 0.566 | 1.11E-32 | ASB6 | 0.493 | 4.89E-24 | DGAT1 | 0.437 | 1.20E-18 | FAN1 | -0.423 | 1.74E-17 |
| PGP | 0.566 | 1.15E-32 | NOP58 | 0.493 | 5.12E-24 | SIGIRR | 0.436 | 1.23E-18 | FBXO38 | -0.424 | 1.49E-17 |
| C19orf43 | 0.565 | 1.36E-32 | OTUB1 | 0.492 | 5.43E-24 | NUDT16L1 | 0.436 | 1.34E-18 | UVRAG | -0.424 | 1.48E-17 |
| COX6C | 0.565 | 1.39E-32 | ACD | 0.492 | 5.80E-24 | JOSD2 | 0.436 | 1.35E-18 | PTPN4 | -0.424 | 1.40E-17 |
| SMIM4 | 0.565 | 1.48E-32 | LAGE3 | 0.492 | 6.02E-24 | SAG | 0.436 | 1.37E-18 | SMG6 | -0.424 | 1.39E-17 |
| TLCD1 | 0.565 | 1.52E-32 | CHCHD7 | 0.492 | 6.16E-24 | HIKESHI | 0.436 | 1.44E-18 | USP16 | -0.424 | 1.35E-17 |
| RUVBL2 | 0.564 | 1.67E-32 | SCAMP3 | 0.492 | 6.70E-24 | COA6 | 0.436 | 1.45E-18 | ZBTB44 | -0.424 | 1.32E-17 |
| CKLF | 0.564 | 1.87E-32 | MYBBP1A | 0.491 | 7.63E-24 | CD68 | 0.435 | 1.48E-18 | LTN1 | -0.425 | 1.18E-17 |
| C12orf10 | 0.564 | 1.89E-32 | BORCS6 | 0.491 | 7.87E-24 | ARPC1B | 0.435 | 1.49E-18 | GTF2I | -0.426 | 9.63E-18 |
| DUS3L | 0.564 | 1.90E-32 | B9D1 | 0.491 | 8.10E-24 | SERGEF | 0.435 | 1.66E-18 | MPP5 | -0.427 | 8.61E-18 |
| PRR13 | 0.564 | 2.11E-32 | TMEM199 | 0.490 | 9.55E-24 | TRIAP1 | 0.435 | 1.76E-18 | ARHGAP21 | -0.427 | 7.55E-18 |
| TOMM5 | 0.564 | 2.13E-32 | POLR2G | 0.490 | 9.57E-24 | CDT1 | 0.434 | 1.82E-18 | RNF40 | -0.428 | 7.08E-18 |
| ZFAND2B | 0.563 | 2.69E-32 | CLPP | 0.490 | 9.77E-24 | ENY2 | 0.434 | 1.84E-18 | ZBTB14 | -0.428 | 6.07E-18 |
| ILKAP | 0.563 | 2.88E-32 | PSMG4 | 0.490 | 9.80E-24 | BCCIP | 0.434 | 1.85E-18 | APC | -0.429 | 5.61E-18 |
| LYPLA2 | 0.562 | 3.14E-32 | CFL1 | 0.489 | 1.21E-23 | SPSB2 | 0.434 | 1.90E-18 | GPATCH8 | -0.429 | 5.44E-18 |
| PYCR3 | 0.562 | 3.15E-32 | NDUFA3 | 0.489 | 1.22E-23 | THOP1 | 0.434 | 2.04E-18 | SBF2 | -0.429 | 5.38E-18 |
| R3HDM4 | 0.562 | 3.77E-32 | ARFRP1 | 0.489 | 1.30E-23 | SHMT2 | 0.434 | 2.06E-18 | DENND4C | -0.430 | 4.76E-18 |
| NLE1 | 0.562 | 3.89E-32 | SPATA2L | 0.489 | 1.33E-23 | PRCC | 0.434 | 2.20E-18 | SRBD1 | -0.430 | 4.72E-18 |
| TMA7 | 0.561 | 4.43E-32 | MYDGF | 0.489 | 1.37E-23 | RPL3 | 0.433 | 2.22E-18 | IRF2 | -0.430 | 4.07E-18 |
| RBM42 | 0.561 | 4.84E-32 | BGLAP | 0.488 | 1.39E-23 | ATPAF2 | 0.433 | 2.27E-18 | RNF169 | -0.431 | 3.59E-18 |
| SRPRB | 0.561 | 5.06E-32 | ZNF622 | 0.488 | 1.41E-23 | UBE2J2 | 0.433 | 2.35E-18 | TCF12 | -0.432 | 3.21E-18 |
| MRPS26 | 0.561 | 5.13E-32 | PHLDA2 | 0.488 | 1.41E-23 | NPM1 | 0.433 | 2.46E-18 | EHBP1 | -0.432 | 2.90E-18 |
| POLRMT | 0.560 | 5.57E-32 | PSMB6 | 0.488 | 1.43E-23 | GUK1 | 0.433 | 2.50E-18 | CEPT1 | -0.433 | 2.39E-18 |
| MRPL17 | 0.560 | 5.61E-32 | NDUFAF8 | 0.488 | 1.53E-23 | U2AF1L4 | 0.433 | 2.54E-18 | CHD9 | -0.434 | 1.92E-18 |
| RPL7A | 0.560 | 5.66E-32 | RPL23 | 0.488 | 1.55E-23 | SLC25A26 | 0.433 | 2.55E-18 | USF3 | -0.434 | 1.90E-18 |
| RNF25 | 0.560 | 6.36E-32 | POLR2J | 0.488 | 1.62E-23 | NDUFA2 | 0.433 | 2.56E-18 | PIK3C2A | -0.434 | 1.87E-18 |
| RPL13 | 0.560 | 7.22E-32 | HSPA4 | 0.488 | 1.67E-23 | FASTK | 0.433 | 2.56E-18 | TRAPPC10 | -0.435 | 1.70E-18 |
| NUTF2 | 0.560 | 7.31E-32 | PNKP | 0.488 | 1.70E-23 | TIMM10 | 0.433 | 2.61E-18 | TBC1D23 | -0.436 | 1.44E-18 |
| TXNL4A | 0.559 | 7.31E-32 | ANKRD39 | 0.488 | 1.73E-23 | B3GALT6 | 0.432 | 2.80E-18 | HECTD1 | -0.437 | 1.10E-18 |
| NXT1 | 0.559 | 7.95E-32 | TMEM115 | 0.488 | 1.73E-23 | CCDC85B | 0.432 | 3.05E-18 | CALD1 | -0.437 | 1.03E-18 |
| RPL14 | 0.559 | 9.77E-32 | BCL2L12 | 0.487 | 1.85E-23 | UCK2 | 0.432 | 3.08E-18 | HIVEP1 | -0.438 | 9.27E-19 |
| SCAND1 | 0.558 | 1.09E-31 | SENP3 | 0.487 | 1.94E-23 | ANKRD13D | 0.432 | 3.18E-18 | AL132639.3 | -0.438 | 9.19E-19 |
| NDUFA11 | 0.558 | 1.21E-31 | MRPL13 | 0.486 | 2.23E-23 | ANP32A | 0.431 | 3.37E-18 | STRN | -0.438 | 8.76E-19 |
| CYHR1 | 0.557 | 1.58E-31 | FKBP1A | 0.486 | 2.29E-23 | JTB | 0.431 | 3.47E-18 | EXOC5 | -0.439 | 7.87E-19 |
| MCRIP2 | 0.557 | 1.59E-31 | RPL26 | 0.486 | 2.37E-23 | SSTR2 | 0.431 | 3.61E-18 | HDHD2 | -0.439 | 7.38E-19 |
| THOC6 | 0.557 | 1.67E-31 | TKT | 0.486 | 2.37E-23 | SMDT1 | 0.431 | 3.84E-18 | SUSD6 | -0.439 | 6.88E-19 |
| RPL35A | 0.557 | 1.67E-31 | SSBP1 | 0.486 | 2.46E-23 | EIF1AD | 0.431 | 3.97E-18 | ATP11B | -0.440 | 5.95E-19 |
| MRPL28 | 0.557 | 1.69E-31 | TRAF2 | 0.486 | 2.53E-23 | BORCS8 | 0.430 | 3.99E-18 | SMARCC2 | -0.440 | 5.75E-19 |
| ATP5J2 | 0.556 | 1.81E-31 | ANKS3 | 0.486 | 2.56E-23 | FAM58A | 0.430 | 4.22E-18 | SLC35A5 | -0.442 | 4.27E-19 |
| DOHH | 0.555 | 2.43E-31 | SMPD2 | 0.486 | 2.57E-23 | TOMM40 | 0.430 | 4.29E-18 | MEF2A | -0.442 | 3.87E-19 |
| DDX49 | 0.555 | 2.62E-31 | NTMT1 | 0.485 | 2.90E-23 | MRPS17 | 0.430 | 4.43E-18 | SLC12A6 | -0.443 | 3.24E-19 |
| GAR1 | 0.555 | 2.72E-31 | TSACC | 0.485 | 3.07E-23 | GAPDH | 0.430 | 4.44E-18 | TJP1 | -0.444 | 2.85E-19 |
| RPL37A | 0.554 | 3.48E-31 | ACOT8 | 0.485 | 3.11E-23 | AGPAT2 | 0.430 | 4.73E-18 | NPAT | -0.444 | 2.63E-19 |
| C8orf59 | 0.554 | 3.75E-31 | FLOT2 | 0.485 | 3.16E-23 | EIF4E2 | 0.429 | 4.91E-18 | TSHZ1 | -0.444 | 2.42E-19 |
| RPL18A | 0.554 | 3.88E-31 | ATP5E | 0.485 | 3.20E-23 | PTBP1 | 0.429 | 4.95E-18 | DNAJC27 | -0.445 | 2.33E-19 |
| COPE | 0.554 | 4.15E-31 | CLDND2 | 0.485 | 3.22E-23 | EIF4EBP1 | 0.429 | 4.98E-18 | DYNC1LI2 | -0.445 | 2.19E-19 |
| EXOSC1 | 0.554 | 4.36E-31 | COPS6 | 0.485 | 3.41E-23 | CCDC61 | 0.429 | 5.02E-18 | HBP1 | -0.446 | 1.93E-19 |
| SSSCA1 | 0.553 | 4.61E-31 | RCC1L | 0.485 | 3.48E-23 | THOC7 | 0.429 | 5.22E-18 | CREBBP | -0.446 | 1.93E-19 |
| HSPBP1 | 0.552 | 6.27E-31 | ATP6V1F | 0.484 | 3.61E-23 | PPP1CC | 0.429 | 5.41E-18 | PPM1A | -0.446 | 1.89E-19 |
| RPS24 | 0.552 | 6.49E-31 | HMBS | 0.484 | 3.68E-23 | POLL | 0.429 | 5.60E-18 | JAK1 | -0.446 | 1.72E-19 |
| ZNF692 | 0.552 | 6.93E-31 | PMF1.BGLAP | 0.484 | 3.82E-23 | DDX28 | 0.429 | 5.79E-18 | CTNND1 | -0.446 | 1.69E-19 |
| ZNF408 | 0.552 | 7.15E-31 | MRPS7 | 0.484 | 4.35E-23 | PPCDC | 0.428 | 6.04E-18 | PIK3R4 | -0.447 | 1.37E-19 |
| TRMT61A | 0.552 | 7.72E-31 | SSR2 | 0.484 | 4.41E-23 | DNAJC7 | 0.428 | 6.13E-18 | PCNX1 | -0.447 | 1.29E-19 |
| PYM1 | 0.551 | 8.01E-31 | B4GALT2 | 0.484 | 4.43E-23 | NCAPH2 | 0.428 | 6.16E-18 | GTF2A1 | -0.448 | 1.26E-19 |
| UQCC2 | 0.551 | 8.39E-31 | MRPL58 | 0.483 | 4.51E-23 | RPL41 | 0.428 | 6.23E-18 | TEAD1 | -0.449 | 9.64E-20 |
| DRAP1 | 0.551 | 8.47E-31 | ANAPC5 | 0.483 | 4.62E-23 | GCN1 | 0.428 | 6.39E-18 | ARL2BP | -0.449 | 9.50E-20 |
| RPL27A | 0.551 | 9.69E-31 | MARS | 0.483 | 4.90E-23 | LAMTOR1 | 0.428 | 6.91E-18 | WWC2 | -0.449 | 9.02E-20 |
| HRAS | 0.550 | 1.28E-30 | RNASEH2C | 0.482 | 6.52E-23 | PAF1 | 0.428 | 7.02E-18 | JMJD1C | -0.449 | 8.98E-20 |
| MRPL22 | 0.550 | 1.29E-30 | BCL7C | 0.482 | 6.62E-23 | PTRHD1 | 0.427 | 7.28E-18 | MAP3K2 | -0.449 | 8.73E-20 |
| RPL30 | 0.550 | 1.29E-30 | ETV2 | 0.481 | 7.35E-23 | SH3GL1 | 0.427 | 7.28E-18 | TOGARAM1 | -0.449 | 8.42E-20 |
| HSPE1 | 0.550 | 1.33E-30 | TPD52L2 | 0.481 | 7.61E-23 | RBM8A | 0.427 | 7.31E-18 | KIDINS220 | -0.450 | 8.00E-20 |
| NOSIP | 0.549 | 1.46E-30 | AURKAIP1 | 0.481 | 7.81E-23 | ZNF511 | 0.427 | 7.80E-18 | FAM214A | -0.450 | 7.69E-20 |
| NME6 | 0.549 | 1.66E-30 | PDAP1 | 0.481 | 8.58E-23 | THAP7 | 0.427 | 7.88E-18 | ERCC4 | -0.452 | 5.42E-20 |
| COA4 | 0.549 | 1.75E-30 | COMMD7 | 0.481 | 8.76E-23 | PGD | 0.427 | 7.99E-18 | ZXDA | -0.452 | 5.39E-20 |
| CYC1 | 0.548 | 1.94E-30 | CCDC88B | 0.480 | 1.07E-22 | CDC25A | 0.427 | 8.26E-18 | CARF | -0.453 | 4.27E-20 |
| RPS21 | 0.548 | 1.96E-30 | SELENOH | 0.480 | 1.11E-22 | ZNF335 | 0.427 | 8.28E-18 | USP34 | -0.453 | 4.24E-20 |
| ATAD3A | 0.548 | 1.99E-30 | RRS1 | 0.480 | 1.11E-22 | FUT5 | 0.427 | 8.33E-18 | NEK1 | -0.453 | 4.18E-20 |
| MLST8 | 0.548 | 2.02E-30 | WDR46 | 0.479 | 1.17E-22 | HCST | 0.427 | 8.45E-18 | ZFP91 | -0.453 | 3.83E-20 |
| BRAT1 | 0.547 | 2.84E-30 | KRT18 | 0.479 | 1.17E-22 | CERS5 | 0.426 | 8.71E-18 | BIRC6 | -0.455 | 2.61E-20 |
| MRPL55 | 0.547 | 3.32E-30 | SNF8 | 0.479 | 1.20E-22 | PSMC3 | 0.426 | 8.72E-18 | GAB1 | -0.455 | 2.48E-20 |
| ATP5G1 | 0.546 | 3.75E-30 | ST6GALNAC4 | 0.479 | 1.20E-22 | NAT10 | 0.426 | 9.21E-18 | MARF1 | -0.456 | 2.03E-20 |
| TMEM11 | 0.546 | 3.76E-30 | NEURL2 | 0.479 | 1.20E-22 | THOC5 | 0.426 | 9.36E-18 | CLOCK | -0.456 | 1.97E-20 |
| MRPS15 | 0.546 | 4.14E-30 | SELENOM | 0.479 | 1.36E-22 | RAB4B | 0.426 | 9.38E-18 | RNF111 | -0.456 | 1.96E-20 |
| BRAP | 0.546 | 4.37E-30 | COX4I1 | 0.479 | 1.41E-22 | NSMCE2 | 0.426 | 9.44E-18 | TMEM184C | -0.456 | 1.94E-20 |
| CCDC124 | 0.545 | 4.64E-30 | ARL16 | 0.478 | 1.47E-22 | CENPV | 0.426 | 9.54E-18 | PJA2 | -0.457 | 1.88E-20 |
| RPL19 | 0.545 | 5.20E-30 | AL159163.1 | 0.478 | 1.52E-22 | DDX31 | 0.426 | 1.04E-17 | MKL2 | -0.457 | 1.72E-20 |
| PTOV1 | 0.544 | 6.36E-30 | BABAM1 | 0.478 | 1.54E-22 | ARRDC1 | 0.426 | 1.05E-17 | KLHL20 | -0.459 | 1.22E-20 |
| BNIP1 | 0.544 | 6.49E-30 | NDUFAF4 | 0.478 | 1.54E-22 | PRMT7 | 0.425 | 1.13E-17 | RBM43 | -0.459 | 1.11E-20 |
| NABP2 | 0.544 | 6.61E-30 | UQCR10 | 0.478 | 1.59E-22 | TRABD | 0.425 | 1.17E-17 | GABPA | -0.460 | 9.94E-21 |
| FTL | 0.544 | 6.85E-30 | ETFB | 0.478 | 1.64E-22 | C11orf98 | 0.425 | 1.20E-17 | CENPC | -0.460 | 8.06E-21 |
| METTL26 | 0.544 | 7.72E-30 | TRMT2A | 0.478 | 1.70E-22 | RPL10A | 0.425 | 1.25E-17 | MFAP3 | -0.462 | 5.59E-21 |
| PSENEN | 0.544 | 7.86E-30 | DRG1 | 0.478 | 1.72E-22 | BCAS4 | 0.425 | 1.26E-17 | ARHGAP5 | -0.463 | 4.91E-21 |
| ZNF593 | 0.544 | 7.96E-30 | NARFL | 0.478 | 1.80E-22 | LMAN2 | 0.425 | 1.28E-17 | SYNJ1 | -0.463 | 4.27E-21 |
| RPS6 | 0.543 | 8.67E-30 | LRRC14 | 0.477 | 1.83E-22 | MON1A | 0.424 | 1.29E-17 | FRYL | -0.464 | 4.05E-21 |
| MRPS34 | 0.543 | 9.33E-30 | NDUFB11 | 0.477 | 1.87E-22 | LENG1 | 0.424 | 1.36E-17 | XRN1 | -0.466 | 2.62E-21 |
| FARSA | 0.542 | 1.14E-29 | INAFM1 | 0.477 | 1.89E-22 | ZNF358 | 0.424 | 1.40E-17 | FBXO11 | -0.466 | 2.54E-21 |
| RPS19 | 0.542 | 1.21E-29 | FAM50A | 0.477 | 1.91E-22 | HSCB | 0.424 | 1.43E-17 | NEMF | -0.466 | 2.24E-21 |
| RPS8 | 0.542 | 1.29E-29 | POMP | 0.477 | 2.01E-22 | UROS | 0.424 | 1.45E-17 | ZMYND11 | -0.468 | 1.61E-21 |
| ZNF579 | 0.541 | 1.85E-29 | RPL13A | 0.477 | 2.06E-22 | CREB3 | 0.424 | 1.46E-17 | RAPGEF2 | -0.469 | 1.26E-21 |
| PTCD1 | 0.540 | 1.90E-29 | SUGP1 | 0.477 | 2.17E-22 | ALKBH7 | 0.424 | 1.47E-17 | BMPR2 | -0.469 | 1.21E-21 |
| MAF1 | 0.540 | 1.96E-29 | CAPN10 | 0.477 | 2.22E-22 | SMIM26 | 0.424 | 1.48E-17 | BOD1L1 | -0.471 | 7.90E-22 |
| PRPF6 | 0.540 | 2.06E-29 | TXNDC17 | 0.477 | 2.27E-22 | TBL3 | 0.424 | 1.49E-17 | DYRK1A | -0.472 | 6.50E-22 |
| UBALD2 | 0.540 | 2.34E-29 | GLI4 | 0.476 | 2.32E-22 | SQOR | 0.424 | 1.51E-17 | CASC4 | -0.473 | 4.67E-22 |
| ELOB | 0.539 | 2.67E-29 | C20orf27 | 0.476 | 2.50E-22 | TMEM9 | 0.424 | 1.55E-17 | STAG1 | -0.474 | 4.24E-22 |
| ATP6V0B | 0.539 | 2.89E-29 | GTF3C6 | 0.476 | 2.50E-22 | C17orf62 | 0.423 | 1.56E-17 | SECISBP2L | -0.474 | 4.12E-22 |
| NDUFA13 | 0.539 | 2.92E-29 | LINC00116 | 0.476 | 2.55E-22 | PSMD4 | 0.423 | 1.61E-17 | KCTD18 | -0.478 | 1.56E-22 |
| RFT1 | 0.539 | 3.12E-29 | MRPL51 | 0.476 | 2.56E-22 | MRPL57 | 0.423 | 1.69E-17 | ZNF41 | -0.481 | 7.98E-23 |
| MRPS25 | 0.538 | 3.49E-29 | SYNE4 | 0.476 | 2.72E-22 | UPP1 | 0.423 | 1.74E-17 | MACF1 | -0.482 | 6.07E-23 |
| DGUOK | 0.538 | 3.56E-29 | AC011498.1 | 0.476 | 2.74E-22 | EEF1E1 | 0.423 | 1.80E-17 | KLHL28 | -0.483 | 4.67E-23 |
| MRPS16 | 0.538 | 3.80E-29 | RAC1 | 0.476 | 2.82E-22 | LAMTOR5 | 0.423 | 1.88E-17 | ROCK1 | -0.484 | 3.58E-23 |
| CCDC167 | 0.538 | 4.22E-29 | RANBP1 | 0.475 | 2.86E-22 | NDUFA12 | 0.422 | 1.94E-17 | KBTBD4 | -0.488 | 1.73E-23 |
| EEF1G | 0.538 | 4.25E-29 | CLTB | 0.475 | 2.87E-22 | RPS13 | 0.422 | 2.00E-17 | SPG11 | -0.488 | 1.61E-23 |
| DTX2 | 0.537 | 4.47E-29 | MRPL36 | 0.475 | 2.87E-22 | ZNHIT1 | 0.422 | 2.11E-17 | TRAF6 | -0.492 | 6.70E-24 |
| QTRT1 | 0.537 | 4.71E-29 | KLF16 | 0.475 | 2.95E-22 | SLC39A3 | 0.422 | 2.25E-17 | TRAPPC8 | -0.493 | 4.46E-24 |
| PSMD13 | 0.537 | 4.81E-29 | UCK1 | 0.475 | 3.01E-22 | PDCD2 | 0.422 | 2.27E-17 | HMG20A | -0.494 | 3.66E-24 |
| TARBP2 | 0.537 | 5.05E-29 | ANP32B | 0.475 | 3.43E-22 | SRA1 | 0.421 | 2.29E-17 | KIAA1109 | -0.498 | 1.40E-24 |
| RPL7 | 0.537 | 5.07E-29 | KRTAP5.7 | 0.474 | 3.82E-22 | MSI1 | 0.421 | 2.31E-17 | SOS2 | -0.499 | 1.07E-24 |
| TIGD5 | 0.537 | 5.15E-29 | ATP5I | 0.474 | 3.88E-22 | CEBPZOS | 0.421 | 2.33E-17 | TRIP11 | -0.501 | 7.22E-25 |
| FKBP11 | 0.537 | 5.48E-29 | C12orf65 | 0.474 | 4.26E-22 | RAB24 | 0.421 | 2.51E-17 | RBL2 | -0.503 | 4.13E-25 |
| MRPS5 | 0.536 | 6.27E-29 | CHKB | 0.474 | 4.42E-22 | PTDSS1 | 0.421 | 2.52E-17 | EFCAB14 | -0.503 | 3.78E-25 |
| APRT | 0.536 | 6.55E-29 | BLOC1S4 | 0.473 | 4.57E-22 | TSFM | 0.421 | 2.57E-17 | MORC3 | -0.517 | 1.22E-26 |
| RPL39 | 0.536 | 7.01E-29 | DNAJC17 | 0.473 | 5.41E-22 | NELFB | 0.421 | 2.68E-17 | PIK3CA | -0.518 | 8.06E-27 |
| RPL23A | 0.536 | 7.24E-29 | TIMM22 | 0.473 | 5.55E-22 | TRAIP | 0.420 | 2.77E-17 | HERC3 | -0.527 | 7.98E-28 |
| NOP10 | 0.535 | 9.59E-29 | TBC1D22A | 0.473 | 5.60E-22 | MYPOP | 0.420 | 2.8E-17 | UBR1 | -0.534 | 1.28E-28 |

**Table S9. Differential genes between high and low *PUS1* groups in TCGA cohort**

| **Gene** | **lowMean** | **highMean** | **Log2FC** | **p-Value** | **FDR** | **Gene** | **lowMean** | **highMean** | **Log2FC** | **p-Value** | **FDR** |
| --- | --- | --- | --- | --- | --- | --- | --- | --- | --- | --- | --- |
| ANGPTL7 | 120.372 | 4.606 | -4.708 | 4.55E-05 | 1.43E-04 | GDF15 | 3012.045 | 6090.603 | 1.016 | 6.54E-07 | 2.98E-06 |
| SMYD1 | 23.418 | 1.175 | -4.317 | 8.73E-04 | 0.002052 | RPL37A | 19775.808 | 40039.366 | 1.018 | 2.14E-19 | 1.62E-17 |
| CRTAC1 | 361.725 | 26.763 | -3.757 | 1.41E-02 | 2.47E-02 | S100A5 | 0.835 | 1.692 | 1.019 | 3.51E-03 | 7.17E-03 |
| MSLN | 163.616 | 12.542 | -3.705 | 0.016955 | 0.02896 | SLC12A5 | 43.922 | 89.023 | 1.019 | 5.01E-06 | 1.91E-05 |
| ASB15 | 21.244 | 1.930 | -3.460 | 0.002221 | 0.00475 | RPL27A | 19474.186 | 39515.817 | 1.021 | 1.15E-20 | 1.29E-18 |
| PEBP4 | 124.996 | 11.633 | -3.426 | 1.33E-04 | 0.000378 | S100A1 | 331.830 | 673.400 | 1.021 | 0.014063 | 0.024556 |
| EPHA7 | 23.842 | 2.902 | -3.038 | 0.000341 | 0.000885 | CARD14 | 25.954 | 52.692 | 1.022 | 1.98E-02 | 3.33E-02 |
| INS-IGF2 | 46.866 | 6.490 | -2.852 | 4.93E-09 | 3.44E-08 | H2AFY2 | 518.117 | 1052.574 | 1.023 | 1.37E-06 | 5.83E-06 |
| CYP2A13 | 373.090 | 52.011 | -2.843 | 4.92E-05 | 0.000153 | PITX1 | 164.135 | 333.650 | 1.023 | 4.50E-05 | 1.41E-04 |
| WSCD2 | 15.956 | 2.472 | -2.690 | 5.24E-07 | 2.42E-06 | FOXJ1 | 97.212 | 197.931 | 1.026 | 0.031019 | 0.049316 |
| NOS1 | 35.498 | 5.507 | -2.688 | 0.001135 | 0.002598 | RPL32 | 20656.921 | 42078.338 | 1.026 | 2.47E-22 | 4.74E-20 |
| FGF20 | 10.561 | 1.710 | -2.627 | 0.004527 | 0.008982 | RPS28 | 8912.078 | 18170.643 | 1.028 | 3.70E-15 | 9.29E-14 |
| HEMGN | 5.216 | 0.907 | -2.523 | 0.000181 | 0.000501 | TSPO2 | 24.693 | 50.349 | 1.028 | 9.09E-08 | 4.93E-07 |
| PADI1 | 373.895 | 71.676 | -2.383 | 0.03062 | 0.048761 | TREM2 | 168.704 | 344.013 | 1.028 | 1.03E-05 | 3.71E-05 |
| RP1 | 4.375 | 0.843 | -2.375 | 0.000281 | 0.000747 | ROMO1 | 2537.810 | 5178.535 | 1.029 | 5.25E-19 | 3.47E-17 |
| ANO3 | 142.100 | 27.522 | -2.368 | 1.30E-07 | 6.83E-07 | RPS24 | 22586.505 | 46111.873 | 1.030 | 8.54E-20 | 7.36E-18 |
| CHRM2 | 9.509 | 1.847 | -2.364 | 5.08E-04 | 1.26E-03 | RPL38 | 11598.311 | 23689.436 | 1.030 | 7.78E-19 | 4.93E-17 |
| NDNF | 28.644 | 5.651 | -2.342 | 4.14E-05 | 0.000131 | LY96 | 267.513 | 547.323 | 1.033 | 0.000419 | 0.001059 |
| TACR1 | 95.304 | 19.914 | -2.259 | 1.19E-03 | 2.71E-03 | S100A2 | 27.619 | 56.523 | 1.033 | 5.46E-07 | 2.52E-06 |
| MEP1B | 45.612 | 9.550 | -2.256 | 9.96E-10 | 8.03E-09 | FAM24B | 17.698 | 36.233 | 1.034 | 1.74E-06 | 7.28E-06 |
| ADARB2 | 44.436 | 9.742 | -2.189 | 1.41E-02 | 2.46E-02 | HSPB1 | 17587.892 | 36018.612 | 1.034 | 2.84E-17 | 1.19E-15 |
| SHC4 | 53.939 | 12.455 | -2.115 | 0.000378 | 0.000968 | CTHRC1 | 240.658 | 493.045 | 1.035 | 0.010074 | 0.018236 |
| TMEM252 | 65.574 | 15.528 | -2.078 | 8.45E-06 | 3.10E-05 | ANKRD1 | 114.998 | 235.843 | 1.036 | 0.002396 | 0.005088 |
| FAM196B | 5.086 | 1.221 | -2.059 | 5.27E-05 | 0.000163 | TEX29 | 6.971 | 14.302 | 1.037 | 9.19E-05 | 2.71E-04 |
| PCDHA12 | 17.029 | 4.226 | -2.011 | 1.76E-04 | 4.88E-04 | NAT14 | 230.774 | 474.216 | 1.039 | 2.03E-08 | 1.26E-07 |
| RASGRF1 | 251.727 | 62.500 | -2.010 | 8.87E-03 | 1.63E-02 | CTXN1 | 29.019 | 59.664 | 1.040 | 0.001377 | 0.003086 |
| SLC12A1 | 257.548 | 66.941 | -1.944 | 0.011559 | 0.020617 | SURF2 | 505.280 | 1039.997 | 1.041 | 2.40E-21 | 3.23E-19 |
| CKMT2 | 477.153 | 124.152 | -1.942 | 3.58E-06 | 1.41E-05 | FABP1 | 37667.081 | 77549.578 | 1.042 | 0.000105 | 0.000306 |
| SLITRK6 | 9.950 | 2.590 | -1.942 | 1.23E-02 | 2.17E-02 | GPC3 | 21667.187 | 44688.113 | 1.044 | 1.19E-06 | 5.13E-06 |
| PLXNA4 | 161.076 | 42.045 | -1.938 | 2.22E-05 | 7.49E-05 | ZP3 | 68.320 | 141.142 | 1.047 | 1.81E-10 | 1.69E-09 |
| LMOD2 | 8.359 | 2.187 | -1.934 | 0.014141 | 0.024666 | ZNF593 | 166.804 | 344.782 | 1.048 | 4.47E-13 | 7.17E-12 |
| B3GALT1 | 48.463 | 12.765 | -1.925 | 9.93E-03 | 1.80E-02 | SLC52A2 | 917.002 | 1898.394 | 1.050 | 1.04E-23 | 3.60E-21 |
| ANGPTL1 | 543.499 | 146.298 | -1.893 | 8.27E-09 | 5.55E-08 | RAB34 | 656.575 | 1360.955 | 1.052 | 0.002284 | 0.00487 |
| SLC22A2 | 25.310 | 6.976 | -1.859 | 4.11E-03 | 8.25E-03 | CD68 | 54.087 | 112.182 | 1.052 | 2.75E-07 | 1.35E-06 |
| EDN3 | 10.265 | 2.850 | -1.849 | 0.00044 | 0.001107 | CACNA1E | 25.003 | 51.875 | 1.053 | 0.001232 | 0.002789 |
| CLEC4M | 52.293 | 14.532 | -1.847 | 0.023257 | 0.038304 | RPL7 | 16957.063 | 35193.993 | 1.053 | 1.27E-18 | 7.69E-17 |
| SYT2 | 45.355 | 12.992 | -1.804 | 3.76E-04 | 9.64E-04 | ORAOV1 | 643.514 | 1337.456 | 1.055 | 9.46E-06 | 3.43E-05 |
| AC091551.1 | 1.530 | 0.439 | -1.802 | 3.95E-16 | 1.27E-14 | NNMT | 14667.502 | 30485.769 | 1.056 | 9.99E-04 | 2.32E-03 |
| GOLGA6A | 7.882 | 2.282 | -1.788 | 1.42E-12 | 2.02E-11 | FDX2 | 83.197 | 173.267 | 1.058 | 2.34E-18 | 1.32E-16 |
| ATP1A2 | 320.292 | 92.863 | -1.786 | 1.07E-04 | 3.13E-04 | UPK3BL1 | 12.057 | 25.135 | 1.060 | 3.80E-03 | 7.71E-03 |
| CTNNA3 | 131.697 | 38.604 | -1.770 | 2.30E-06 | 9.41E-06 | CNFN | 31.482 | 65.678 | 1.061 | 1.46E-03 | 0.003244 |
| TYRP1 | 63.856 | 18.743 | -1.768 | 1.12E-02 | 2.01E-02 | FFAR2 | 14.400 | 30.076 | 1.063 | 0.006819 | 0.012924 |
| TBX20 | 2.109 | 0.619 | -1.768 | 1.97E-06 | 8.14E-06 | PLAC8L1 | 9.903 | 20.713 | 1.065 | 2.72E-09 | 2.01E-08 |
| COL25A1 | 18.530 | 5.580 | -1.731 | 7.83E-11 | 7.91E-10 | DKK1 | 541.254 | 1132.781 | 1.065 | 1.28E-02 | 2.26E-02 |
| HMGCLL1 | 10.616 | 3.205 | -1.728 | 9.29E-07 | 4.09E-06 | RPL13 | 24037.384 | 50411.696 | 1.068 | 1.28E-14 | 2.82E-13 |
| SYT9 | 103.426 | 31.686 | -1.707 | 2.20E-09 | 1.65E-08 | RGS20 | 5.922 | 12.422 | 1.069 | 7.98E-08 | 4.38E-07 |
| CYP26A1 | 151.515 | 46.450 | -1.706 | 7.13E-03 | 1.35E-02 | DIRAS1 | 48.220 | 101.451 | 1.073 | 0.028494 | 0.045823 |
| NWD2 | 87.951 | 27.786 | -1.662 | 2.48E-02 | 4.06E-02 | SPERT | 4.301 | 9.054 | 1.074 | 4.79E-04 | 0.001193 |
| FNDC5 | 2425.447 | 767.748 | -1.660 | 2.44E-09 | 1.82E-08 | JPT1 | 1525.217 | 3214.965 | 1.076 | 8.35E-19 | 5.26E-17 |
| PDZRN4 | 15.091 | 4.794 | -1.654 | 1.02E-03 | 2.36E-03 | RPS20 | 26674.063 | 56253.867 | 1.077 | 4.07E-19 | 2.78E-17 |
| ESR1 | 590.832 | 189.694 | -1.639 | 9.86E-14 | 1.81E-12 | CRYBB2 | 4.122 | 8.701 | 1.078 | 1.09E-05 | 3.92E-05 |
| FAM163B | 53.031 | 17.093 | -1.633 | 0.000343 | 0.000889 | IFITM10 | 412.191 | 870.486 | 1.079 | 3.50E-05 | 0.000112 |
| DRD1 | 91.757 | 29.736 | -1.626 | 1.58E-07 | 8.17E-07 | FTL | 339984.085 | 719118.059 | 1.081 | 1.32E-16 | 4.76E-15 |
| AQP4 | 92.033 | 30.214 | -1.607 | 2.59E-10 | 2.36E-09 | TFAP2E | 12.861 | 27.221 | 1.082 | 3.97E-06 | 1.55E-05 |
| CYP2A7 | 5106.601 | 1695.712 | -1.590 | 6.88E-05 | 2.08E-04 | RPL18 | 17309.586 | 36638.816 | 1.082 | 2.54E-22 | 4.82E-20 |
| ST8SIA6 | 9.349 | 3.119 | -1.584 | 1.09E-08 | 7.19E-08 | UBE2S | 496.052 | 1050.324 | 1.082 | 1.38E-16 | 4.95E-15 |
| ZBED6 | 165.457 | 55.373 | -1.579 | 6.79E-20 | 5.99E-18 | NAALADL1 | 197.308 | 417.978 | 1.083 | 3.42E-05 | 0.00011 |
| PLN | 119.089 | 40.065 | -1.572 | 0.010462 | 0.018863 | MYLK2 | 5.408 | 11.458 | 1.083 | 0.001381 | 0.003093 |
| NCAM2 | 92.938 | 31.329 | -1.569 | 1.51E-07 | 7.84E-07 | KCNC2 | 26.897 | 57.034 | 1.084 | 0.005522 | 0.010756 |
| WNT9B | 9.884 | 3.349 | -1.561 | 6.44E-10 | 5.42E-09 | NPW | 412.596 | 876.967 | 1.088 | 1.43E-04 | 0.000405 |
| NPBWR1 | 43.659 | 14.803 | -1.560 | 0.000517 | 0.001277 | GNG4 | 355.990 | 756.971 | 1.088 | 0.000397 | 0.001009 |
| ZNF728 | 13.749 | 4.698 | -1.549 | 1.54E-05 | 5.34E-05 | HIST2H2AC | 30.076 | 64.034 | 1.090 | 1.16E-11 | 1.36E-10 |
| CYP1A2 | 5220.269 | 1785.991 | -1.547 | 0.000842 | 0.001988 | NME1 | 1877.373 | 3998.245 | 1.091 | 1.62E-23 | 5.12E-21 |
| CNDP1 | 561.695 | 193.838 | -1.535 | 2.04E-04 | 5.57E-04 | LAMTOR4 | 2308.680 | 4931.114 | 1.095 | 4.50E-16 | 1.42E-14 |
| RGSL1 | 169.740 | 58.627 | -1.534 | 0.000232 | 0.000627 | C19orf18 | 18.915 | 40.417 | 1.095 | 2.11E-03 | 4.53E-03 |
| EDAR | 92.468 | 32.085 | -1.527 | 8.74E-07 | 3.87E-06 | PCSK1N | 169.150 | 362.249 | 1.099 | 5.66E-03 | 1.10E-02 |
| LGI1 | 9.981 | 3.464 | -1.527 | 6.73E-06 | 2.51E-05 | RPS21 | 9434.021 | 20215.211 | 1.099 | 4.45E-18 | 2.34E-16 |
| IGSF10 | 37.228 | 12.927 | -1.526 | 5.45E-10 | 4.65E-09 | CKMT1A | 11.838 | 25.391 | 1.101 | 5.70E-03 | 1.10E-02 |
| C7 | 5327.670 | 1856.326 | -1.521 | 5.92E-06 | 2.23E-05 | S100A13 | 1158.741 | 2491.363 | 1.104 | 1.38E-10 | 1.32E-09 |
| FBXO40 | 24.259 | 8.458 | -1.520 | 0.000425 | 0.001072 | RPL18A | 7979.732 | 17193.330 | 1.107 | 1.43E-21 | 2.08E-19 |
| NLRP14 | 11.152 | 3.893 | -1.518 | 2.10E-10 | 1.94E-09 | SLC6A7 | 6.420 | 13.838 | 1.108 | 1.89E-02 | 3.18E-02 |
| GOLGA6B | 7.764 | 2.712 | -1.518 | 4.18E-11 | 4.44E-10 | AURKB | 255.293 | 551.715 | 1.112 | 1.39E-10 | 1.33E-09 |
| GABRB3 | 328.249 | 115.495 | -1.507 | 7.72E-04 | 1.84E-03 | TMEM89 | 0.782 | 1.693 | 1.114 | 3.37E-04 | 8.76E-04 |
| CCR9 | 3.428 | 1.208 | -1.505 | 4.76E-04 | 1.19E-03 | TM4SF5 | 6726.326 | 14565.344 | 1.115 | 1.77E-06 | 7.40E-06 |
| RANBP3L | 108.798 | 38.346 | -1.505 | 2.86E-07 | 1.40E-06 | RANGRF | 211.943 | 459.410 | 1.116 | 6.07E-20 | 5.55E-18 |
| GRAMD2 | 11.142 | 3.999 | -1.478 | 1.86E-02 | 3.14E-02 | AC007192.1 | 1.778 | 3.856 | 1.117 | 5.21E-05 | 0.000161 |
| COLEC10 | 140.123 | 50.482 | -1.473 | 0.000481 | 0.001197 | RENBP | 394.442 | 856.527 | 1.119 | 2.84E-04 | 7.55E-04 |
| FCN2 | 159.863 | 57.615 | -1.472 | 0.000681 | 0.001638 | AC007998.2 | 0.882 | 1.919 | 1.122 | 2.32E-04 | 6.28E-04 |
| CRHBP | 271.485 | 97.866 | -1.472 | 1.00E-05 | 3.61E-05 | CPLX2 | 1963.389 | 4273.820 | 1.122 | 0.001313 | 0.002957 |
| PDGFD | 764.856 | 277.143 | -1.465 | 4.89E-10 | 4.21E-09 | CRYAB | 693.700 | 1513.593 | 1.126 | 1.47E-02 | 2.55E-02 |
| AKAP2 | 10.938 | 3.978 | -1.459 | 4.28E-19 | 2.91E-17 | P2RY6 | 74.655 | 163.123 | 1.128 | 1.27E-03 | 2.88E-03 |
| OMG | 59.907 | 21.792 | -1.459 | 0.001282 | 0.002892 | FABP5 | 196.243 | 429.346 | 1.129 | 3.02E-11 | 3.30E-10 |
| PCDHA11 | 16.100 | 5.901 | -1.448 | 6.73E-03 | 1.28E-02 | RPLP2 | 17816.753 | 38992.084 | 1.130 | 1.95E-24 | 8.49E-22 |
| MYH7B | 444.223 | 162.965 | -1.447 | 0.000483 | 0.001201 | RPSA | 12965.393 | 28425.991 | 1.133 | 4.38E-25 | 2.40E-22 |
| FRMD7 | 24.692 | 9.073 | -1.444 | 1.72E-08 | 1.08E-07 | PPAN | 184.855 | 406.084 | 1.135 | 1.14E-27 | 1.88E-24 |
| RNASE7 | 37.701 | 13.897 | -1.440 | 7.33E-06 | 2.72E-05 | FOXA3 | 1814.622 | 3995.132 | 1.139 | 1.34E-10 | 1.28E-09 |
| GPLD1 | 2392.428 | 883.162 | -1.438 | 6.01E-09 | 4.14E-08 | SLX1A | 1.188 | 2.616 | 1.139 | 1.51E-06 | 6.39E-06 |
| CD300LG | 90.029 | 33.933 | -1.408 | 1.13E-07 | 6.02E-07 | PLBD1 | 254.045 | 559.630 | 1.139 | 0.00619 | 0.01187 |
| ALKAL2 | 104.667 | 39.463 | -1.407 | 0.018159 | 0.030737 | C1orf100 | 2.360 | 5.201 | 1.140 | 7.49E-07 | 3.37E-06 |
| CCDC85A | 12.116 | 4.600 | -1.397 | 8.97E-16 | 2.63E-14 | FBL | 3350.651 | 7397.247 | 1.143 | 7.80E-25 | 3.85E-22 |
| GLYATL3 | 5.593 | 2.148 | -1.381 | 0.001104 | 0.00253 | PLA2G7 | 227.169 | 502.597 | 1.146 | 2.23E-03 | 4.76E-03 |
| UST | 298.682 | 114.848 | -1.379 | 8.68E-06 | 3.17E-05 | LAIR2 | 11.077 | 24.529 | 1.147 | 4.12E-07 | 1.95E-06 |
| GLS2 | 525.579 | 202.962 | -1.373 | 1.38E-05 | 4.82E-05 | NDUFA13 | 1374.702 | 3050.202 | 1.150 | 3.42E-15 | 8.67E-14 |
| UGT1A3 | 670.892 | 259.150 | -1.372 | 1.84E-07 | 9.37E-07 | RECQL4 | 643.170 | 1427.597 | 1.150 | 2.19E-15 | 5.83E-14 |
| CDH19 | 95.225 | 36.835 | -1.370 | 1.59E-04 | 4.46E-04 | EEF1G | 16.688 | 37.131 | 1.154 | 3.56E-11 | 3.83E-10 |
| CYP3A4 | 79673.519 | 30823.049 | -1.370 | 1.16E-05 | 4.14E-05 | CKMT1B | 22.790 | 50.849 | 1.158 | 2.40E-03 | 5.09E-03 |
| PCDHGA12 | 52.636 | 20.404 | -1.367 | 1.76E-10 | 1.64E-09 | IGDCC3 | 39.862 | 89.071 | 1.160 | 0.006797 | 0.01289 |
| GSTM1 | 3600.816 | 1396.286 | -1.367 | 0.021608 | 0.035907 | GADD45GIP1 | 1830.960 | 4099.387 | 1.163 | 2.65E-21 | 3.45E-19 |
| FRMPD2 | 5.313 | 2.062 | -1.365 | 1.50E-02 | 2.60E-02 | P2RX5 | 28.303 | 63.439 | 1.164 | 1.67E-08 | 1.05E-07 |
| THSD4 | 1116.026 | 434.377 | -1.361 | 6.15E-16 | 1.87E-14 | LEFTY1 | 44.920 | 100.744 | 1.165 | 0.000782 | 0.001862 |
| VIPR1 | 210.273 | 81.918 | -1.360 | 3.96E-10 | 3.46E-09 | C20orf204 | 185.640 | 417.610 | 1.170 | 0.01039 | 0.018747 |
| SLC18A2 | 17.638 | 6.884 | -1.357 | 9.00E-10 | 7.32E-09 | PUS1 | 778.027 | 1753.225 | 1.172 | 3.86E-62 | 5.72E-58 |
| EHF | 511.230 | 201.120 | -1.346 | 2.05E-05 | 6.96E-05 | BEX2 | 226.755 | 510.983 | 1.172 | 0.00064 | 0.001546 |
| ASB11 | 10.705 | 4.216 | -1.344 | 0.000648 | 0.001566 | DYDC2 | 64.158 | 145.506 | 1.181 | 9.08E-05 | 2.68E-04 |
| HSD17B13 | 9112.510 | 3591.475 | -1.343 | 9.16E-07 | 4.05E-06 | S100A3 | 15.928 | 36.145 | 1.182 | 0.000825 | 0.001953 |
| C10orf67 | 5.929 | 2.341 | -1.340 | 2.63E-02 | 4.27E-02 | SNRPD2 | 3642.772 | 8267.624 | 1.182 | 1.41E-25 | 9.10E-23 |
| LRRTM4 | 39.720 | 15.729 | -1.336 | 0.005579 | 0.010845 | RPL35 | 11497.987 | 26111.766 | 1.183 | 1.13E-22 | 2.40E-20 |
| GRPR | 74.435 | 29.586 | -1.331 | 0.003282 | 0.006757 | POU3F2 | 6.745 | 15.359 | 1.187 | 1.20E-03 | 2.73E-03 |
| MNS1 | 387.870 | 155.021 | -1.323 | 2.96E-05 | 9.69E-05 | ETV4 | 642.249 | 1464.074 | 1.189 | 3.36E-08 | 1.98E-07 |
| FRMD3 | 369.757 | 147.785 | -1.323 | 3.71E-13 | 6.03E-12 | HOXC9 | 22.861 | 52.233 | 1.192 | 1.22E-02 | 2.17E-02 |
| KCNN2 | 125.422 | 50.152 | -1.322 | 1.01E-02 | 0.018276 | CCDC183 | 46.742 | 106.861 | 1.193 | 1.99E-07 | 1.00E-06 |
| CXCR5 | 2.474 | 0.992 | -1.319 | 0.013857 | 0.024245 | NQO1 | 5486.639 | 12546.844 | 1.193 | 1.00E-03 | 2.33E-03 |
| PCDHGA9 | 25.461 | 10.261 | -1.311 | 5.92E-13 | 9.23E-12 | NMB | 139.481 | 319.384 | 1.195 | 1.72E-12 | 2.39E-11 |
| PCDHGB7 | 52.406 | 21.148 | -1.309 | 2.06E-13 | 3.53E-12 | LMX1A | 5.213 | 11.953 | 1.197 | 0.019458 | 0.032675 |
| DCC | 56.602 | 22.889 | -1.306 | 0.000119 | 0.000344 | FAM209B | 2.724 | 6.248 | 1.198 | 7.72E-11 | 7.82E-10 |
| COL6A6 | 14.005 | 5.685 | -1.301 | 0.000532 | 0.001311 | FBN3 | 71.215 | 163.582 | 1.200 | 2.65E-02 | 4.30E-02 |
| VSIG2 | 232.133 | 94.523 | -1.296 | 0.012647 | 0.022336 | PTGES | 155.015 | 356.258 | 1.201 | 0.010463 | 0.018863 |
| AVIL | 569.334 | 232.121 | -1.294 | 1.94E-02 | 3.26E-02 | RPL28 | 18647.244 | 42886.747 | 1.202 | 3.76E-23 | 1.05E-20 |
| MROH2A | 500.329 | 204.223 | -1.293 | 0.002848 | 0.005947 | ZHX1-C8orf76 | 35.148 | 80.844 | 1.202 | 5.69E-22 | 9.69E-20 |
| RAG1 | 61.745 | 25.209 | -1.292 | 4.65E-05 | 0.000146 | SAG | 1.227 | 2.827 | 1.204 | 1.09E-05 | 3.90E-05 |
| GPM6A | 85.965 | 35.247 | -1.286 | 1.98E-06 | 8.21E-06 | C19orf33 | 58.032 | 133.829 | 1.205 | 1.23E-04 | 3.53E-04 |
| SVEP1 | 390.505 | 160.156 | -1.286 | 3.57E-05 | 1.15E-04 | G6PD | 1252.890 | 2890.561 | 1.206 | 2.65E-10 | 2.41E-09 |
| ATP2B3 | 5.978 | 2.452 | -1.286 | 2.01E-02 | 3.37E-02 | SFN | 957.387 | 2213.802 | 1.209 | 8.82E-04 | 0.00207 |
| TNXB | 526.740 | 216.258 | -1.284 | 4.21E-07 | 1.99E-06 | GDPD3 | 46.138 | 107.022 | 1.214 | 1.82E-09 | 1.39E-08 |
| SPATA18 | 299.151 | 122.887 | -1.284 | 5.11E-09 | 3.56E-08 | SSTR2 | 173.503 | 403.012 | 1.216 | 5.50E-03 | 1.07E-02 |
| FAM180A | 110.794 | 45.543 | -1.283 | 7.30E-07 | 3.29E-06 | MYBL2 | 654.450 | 1520.777 | 1.216 | 5.56E-08 | 3.14E-07 |
| IFIT1B | 1.862 | 0.771 | -1.273 | 0.006047 | 0.011636 | GNG8 | 1.723 | 4.005 | 1.216 | 3.11E-04 | 8.15E-04 |
| PLCXD3 | 101.795 | 42.180 | -1.271 | 1.06E-04 | 0.000308 | RPL36 | 10218.275 | 23788.411 | 1.219 | 1.27E-19 | 1.01E-17 |
| SRD5A2 | 1385.026 | 575.646 | -1.267 | 2.19E-06 | 8.99E-06 | PGC | 3753.424 | 8752.383 | 1.221 | 0.000954 | 0.002222 |
| ZNF366 | 51.919 | 21.608 | -1.265 | 3.38E-18 | 1.81E-16 | C19orf84 | 2.143 | 5.002 | 1.223 | 1.74E-02 | 0.029573 |
| BMPER | 38.622 | 16.101 | -1.262 | 0.005302 | 0.010363 | C4orf48 | 54.299 | 127.133 | 1.227 | 1.04E-06 | 4.54E-06 |
| GHR | 3381.005 | 1413.259 | -1.258 | 4.34E-17 | 1.73E-15 | NANOS3 | 2.697 | 6.316 | 1.228 | 2.25E-03 | 0.004813 |
| ITGBL1 | 278.438 | 116.470 | -1.257 | 1.99E-07 | 1.00E-06 | PRAME | 273.504 | 640.742 | 1.228 | 1.14E-03 | 2.61E-03 |
| GALNT4 | 17.147 | 7.182 | -1.255 | 3.56E-15 | 8.97E-14 | KCNF1 | 44.890 | 105.444 | 1.232 | 2.35E-06 | 9.60E-06 |
| CTTNBP2 | 203.821 | 85.479 | -1.254 | 0.000481 | 0.001197 | CDRT1 | 12.669 | 29.811 | 1.234 | 2.27E-05 | 7.63E-05 |
| ZDHHC15 | 20.235 | 8.549 | -1.243 | 8.21E-10 | 6.72E-09 | DPF1 | 5.397 | 12.751 | 1.240 | 1.05E-05 | 3.76E-05 |
| PCDHGB5 | 123.953 | 52.404 | -1.242 | 1.81E-08 | 1.13E-07 | PDE9A | 288.927 | 683.334 | 1.242 | 4.18E-08 | 2.42E-07 |
| PCDHGA3 | 54.650 | 23.127 | -1.241 | 1.27E-07 | 6.68E-07 | HRCT1 | 268.202 | 634.932 | 1.243 | 5.28E-06 | 2.00E-05 |
| ADRA1A | 372.620 | 158.322 | -1.235 | 1.98E-07 | 9.98E-07 | C5orf46 | 18.643 | 44.182 | 1.245 | 4.71E-07 | 2.21E-06 |
| DSG1 | 588.887 | 251.160 | -1.229 | 1.45E-06 | 6.15E-06 | FBXW10 | 40.743 | 96.806 | 1.249 | 8.49E-05 | 0.000251 |
| PIK3CG | 89.863 | 38.338 | -1.229 | 2.69E-09 | 1.99E-08 | UTS2 | 10.667 | 25.442 | 1.254 | 7.19E-03 | 1.36E-02 |
| AC091959.3 | 1.944 | 0.830 | -1.227 | 9.64E-12 | 1.16E-10 | LRRC69 | 22.115 | 52.793 | 1.255 | 4.75E-12 | 6.00E-11 |
| FOSB | 1402.361 | 599.574 | -1.226 | 1.88E-04 | 5.18E-04 | PRR7 | 80.087 | 191.434 | 1.257 | 1.94E-19 | 1.50E-17 |
| DIO2 | 241.737 | 103.374 | -1.226 | 0.025408 | 0.041395 | C2orf82 | 772.773 | 1855.435 | 1.264 | 3.69E-06 | 1.45E-05 |
| CRYBG3 | 248.047 | 106.175 | -1.224 | 5.82E-17 | 2.28E-15 | RPL22L1 | 1243.844 | 2988.833 | 1.265 | 7.16E-18 | 3.56E-16 |
| CCDC144A | 7.629 | 3.289 | -1.214 | 7.20E-05 | 0.000217 | TMEM249 | 4.142 | 9.966 | 1.267 | 6.23E-10 | 5.27E-09 |
| ACE2 | 613.294 | 264.424 | -1.214 | 7.30E-07 | 3.29E-06 | ANKLE1 | 13.023 | 31.466 | 1.273 | 9.08E-04 | 2.13E-03 |
| GP5 | 9.230 | 3.981 | -1.213 | 0.000219 | 0.000594 | FKBP6 | 1.273 | 3.076 | 1.273 | 1.40E-02 | 2.45E-02 |
| LAMA2 | 649.212 | 280.218 | -1.212 | 1.33E-05 | 4.67E-05 | RPL36A | 1597.445 | 3860.931 | 1.273 | 4.56E-25 | 2.41E-22 |
| TRIM58 | 4.438 | 1.917 | -1.211 | 9.82E-06 | 3.54E-05 | REEP2 | 34.582 | 83.675 | 1.275 | 1.30E-09 | 1.02E-08 |
| C11orf42 | 3.917 | 1.695 | -1.208 | 1.99E-11 | 2.25E-10 | BANF2 | 6.777 | 16.421 | 1.277 | 3.50E-03 | 7.15E-03 |
| THSD7B | 28.940 | 12.526 | -1.208 | 2.21E-05 | 7.46E-05 | CXCL1 | 261.984 | 635.336 | 1.278 | 1.19E-02 | 2.12E-02 |
| GDNF | 208.594 | 90.311 | -1.208 | 1.59E-06 | 6.70E-06 | TNNT2 | 18.951 | 46.009 | 1.280 | 1.86E-02 | 3.14E-02 |
| SPACA7 | 8.230 | 3.563 | -1.208 | 9.14E-06 | 3.32E-05 | PIK3R2 | 39.378 | 95.674 | 1.281 | 4.22E-15 | 1.04E-13 |
| FAT4 | 372.628 | 161.377 | -1.207 | 1.12E-17 | 5.36E-16 | FDCSP | 151.334 | 368.697 | 1.285 | 5.60E-03 | 0.010876 |
| PCDHGB4 | 85.659 | 37.110 | -1.207 | 2.10E-04 | 5.73E-04 | ARID3A | 507.724 | 1240.125 | 1.288 | 2.34E-05 | 7.83E-05 |
| PCDHGC3 | 188.132 | 81.603 | -1.205 | 4.49E-14 | 8.76E-13 | PAFAH1B3 | 512.474 | 1252.956 | 1.290 | 2.29E-11 | 2.56E-10 |
| TSPAN5 | 614.648 | 267.848 | -1.198 | 0.02733 | 0.044186 | ITLN2 | 31.382 | 76.854 | 1.292 | 1.05E-02 | 1.89E-02 |
| KLHL11 | 41.402 | 18.049 | -1.198 | 1.15E-19 | 9.34E-18 | GPX2 | 11795.430 | 28891.889 | 1.292 | 1.14E-08 | 7.44E-08 |
| NWD1 | 8.884 | 3.876 | -1.197 | 0.003318 | 0.006821 | C6orf52 | 16.031 | 39.303 | 1.294 | 1.05E-03 | 2.42E-03 |
| SCN7A | 45.920 | 20.066 | -1.194 | 5.93E-03 | 1.14E-02 | TINAG | 143.194 | 351.503 | 1.296 | 3.33E-04 | 0.000867 |
| SLC4A4 | 1755.913 | 767.464 | -1.194 | 7.67E-14 | 1.43E-12 | LY6H | 18.166 | 44.716 | 1.300 | 0.000144 | 0.000407 |
| MALL | 32.384 | 14.177 | -1.192 | 2.33E-12 | 3.13E-11 | RPS19 | 21367.388 | 52602.883 | 1.300 | 3.12E-24 | 1.28E-21 |
| GOLGA8R | 9.788 | 4.293 | -1.189 | 2.98E-15 | 7.75E-14 | OPRD1 | 9.175 | 22.652 | 1.304 | 3.93E-04 | 1.00E-03 |
| SMPD3 | 134.048 | 58.845 | -1.188 | 2.35E-04 | 6.34E-04 | PHLDA2 | 214.949 | 534.065 | 1.313 | 8.88E-10 | 7.23E-09 |
| ABCC9 | 1557.060 | 685.792 | -1.183 | 1.24E-10 | 1.20E-09 | COX7A1 | 194.285 | 483.865 | 1.316 | 0.002344 | 0.004986 |
| PALM2-AKAP2 | 24.582 | 10.837 | -1.182 | 2.59E-17 | 1.10E-15 | GALR2 | 4.747 | 11.826 | 1.317 | 1.23E-06 | 5.29E-06 |
| FAM47E-STBD1 | 3.077 | 1.357 | -1.181 | 3.38E-13 | 5.54E-12 | GABRR3 | 20.786 | 51.975 | 1.322 | 2.54E-05 | 8.42E-05 |
| GRM8 | 70.464 | 31.081 | -1.181 | 0.000222 | 0.000602 | SPHK1 | 564.463 | 1415.850 | 1.327 | 2.02E-06 | 8.33E-06 |
| TMEM27 | 316.392 | 139.624 | -1.180 | 4.71E-05 | 1.47E-04 | RCOR2 | 23.889 | 60.259 | 1.335 | 0.006233 | 0.011941 |
| PCDH7 | 72.883 | 32.250 | -1.176 | 1.22E-03 | 2.76E-03 | VAX2 | 13.974 | 35.318 | 1.338 | 0.00047 | 0.001173 |
| PKHD1 | 566.340 | 251.654 | -1.170 | 2.38E-02 | 3.91E-02 | LGI4 | 149.325 | 377.708 | 1.339 | 3.24E-05 | 1.05E-04 |
| MGAT4C | 136.179 | 60.578 | -1.169 | 1.01E-03 | 2.35E-03 | KCNE5 | 25.243 | 63.960 | 1.341 | 1.21E-12 | 1.75E-11 |
| CWH43 | 9.991 | 4.445 | -1.169 | 3.95E-05 | 0.000126 | BOLA2B | 14.539 | 37.149 | 1.353 | 2.46E-19 | 1.80E-17 |
| CXorf66 | 6.516 | 2.910 | -1.163 | 2.67E-06 | 1.08E-05 | SCX | 29.072 | 74.286 | 1.353 | 1.14E-11 | 1.35E-10 |
| PHGR1 | 9.548 | 4.266 | -1.162 | 1.06E-02 | 1.91E-02 | SLC7A10 | 67.841 | 173.469 | 1.354 | 2.47E-02 | 4.04E-02 |
| AVPR1A | 1439.662 | 643.528 | -1.162 | 6.43E-06 | 2.41E-05 | RPL8 | 42799.691 | 109491.480 | 1.355 | 1.36E-26 | 1.44E-23 |
| ELANE | 5.952 | 2.662 | -1.161 | 2.68E-04 | 7.14E-04 | TLL2 | 11.380 | 29.161 | 1.358 | 2.02E-07 | 1.02E-06 |
| SLC14A1 | 113.544 | 50.958 | -1.156 | 1.43E-04 | 4.06E-04 | DMBT1 | 145.136 | 373.527 | 1.364 | 0.016642 | 0.028502 |
| FMO2 | 154.968 | 69.561 | -1.156 | 1.37E-08 | 8.72E-08 | TMSB10 | 14336.410 | 37054.277 | 1.370 | 3.87E-13 | 6.28E-12 |
| CYP39A1 | 984.979 | 442.449 | -1.155 | 1.81E-05 | 6.20E-05 | CLDND2 | 62.909 | 162.682 | 1.371 | 1.52E-10 | 1.44E-09 |
| ASAP2 | 297.879 | 133.890 | -1.154 | 3.56E-17 | 1.45E-15 | HIST1H2BH | 3.344 | 8.651 | 1.371 | 0.005207 | 0.010196 |
| SGCD | 148.780 | 66.993 | -1.151 | 4.63E-06 | 1.79E-05 | NR0B1 | 22.042 | 57.227 | 1.376 | 1.31E-05 | 4.61E-05 |
| RIPOR3 | 178.950 | 80.634 | -1.150 | 1.09E-08 | 7.16E-08 | NFE2 | 16.045 | 41.714 | 1.378 | 2.95E-05 | 9.65E-05 |
| AL139011.2 | 13.923 | 6.275 | -1.150 | 1.20E-15 | 3.36E-14 | TNNC1 | 79.017 | 206.026 | 1.383 | 7.60E-05 | 2.27E-04 |
| RGS7BP | 49.284 | 22.213 | -1.150 | 4.09E-09 | 2.90E-08 | CCL20 | 1013.145 | 2644.000 | 1.384 | 1.44E-08 | 9.13E-08 |
| ESRRG | 149.324 | 67.342 | -1.149 | 1.01E-04 | 2.95E-04 | SCGB2A1 | 10.127 | 26.445 | 1.385 | 0.007952 | 0.014828 |
| PCDHA13 | 13.842 | 6.245 | -1.148 | 0.000252 | 0.000674 | DMKN | 292.212 | 764.323 | 1.387 | 2.13E-04 | 5.81E-04 |
| PCDHGB3 | 17.994 | 8.131 | -1.146 | 1.47E-10 | 1.40E-09 | DLX6 | 11.278 | 29.570 | 1.391 | 3.66E-03 | 7.45E-03 |
| GPR182 | 45.963 | 20.781 | -1.145 | 0.000188 | 0.000519 | HAUS7 | 72.497 | 190.079 | 1.391 | 1.81E-14 | 3.87E-13 |
| ZNF80 | 4.030 | 1.825 | -1.143 | 0.00048 | 0.001194 | FBLL1 | 46.086 | 121.030 | 1.393 | 3.58E-05 | 1.15E-04 |
| SULT1B1 | 1295.916 | 586.975 | -1.143 | 5.22E-07 | 2.41E-06 | LHB | 1.836 | 4.840 | 1.398 | 6.58E-04 | 1.59E-03 |
| PITPNM3 | 72.697 | 32.954 | -1.141 | 3.98E-03 | 8.01E-03 | BOP1 | 2237.286 | 5898.279 | 1.399 | 3.47E-28 | 7.35E-25 |
| NLGN4X | 276.205 | 125.486 | -1.138 | 1.50E-07 | 7.78E-07 | IGF2BP1 | 398.896 | 1053.558 | 1.401 | 6.28E-07 | 2.87E-06 |
| MTUS2 | 36.849 | 16.757 | -1.137 | 6.55E-03 | 1.25E-02 | DDN | 3.933 | 10.389 | 1.401 | 3.48E-03 | 7.12E-03 |
| ZNF385B | 601.181 | 273.728 | -1.135 | 3.93E-09 | 2.79E-08 | AP1M2 | 487.682 | 1290.673 | 1.404 | 3.90E-05 | 0.000124 |
| GJB4 | 9.335 | 4.257 | -1.133 | 2.20E-05 | 7.42E-05 | ZNF296 | 36.061 | 95.906 | 1.411 | 5.19E-12 | 6.50E-11 |
| PPL | 1578.293 | 719.863 | -1.133 | 5.41E-16 | 1.68E-14 | SELENOM | 1081.741 | 2879.000 | 1.412 | 4.76E-09 | 3.33E-08 |
| RAPH1 | 329.775 | 150.442 | -1.132 | 4.34E-18 | 2.29E-16 | S100A14 | 751.578 | 2000.688 | 1.413 | 9.16E-04 | 2.14E-03 |
| DBH | 312.602 | 142.675 | -1.132 | 1.48E-09 | 1.15E-08 | PKIB | 212.305 | 567.973 | 1.420 | 3.42E-05 | 0.00011 |
| MFSD2A | 3004.816 | 1372.228 | -1.131 | 5.68E-05 | 1.75E-04 | PKHD1L1 | 11.991 | 32.367 | 1.433 | 5.81E-03 | 1.12E-02 |
| PCDHGC4 | 3.474 | 1.588 | -1.130 | 3.50E-06 | 1.38E-05 | SRRM4 | 1.219 | 3.291 | 1.433 | 1.23E-02 | 2.17E-02 |
| ADAMTSL3 | 920.101 | 420.615 | -1.129 | 1.06E-13 | 1.93E-12 | TNFRSF18 | 45.370 | 123.026 | 1.439 | 5.27E-11 | 5.50E-10 |
| TCTEX1D4 | 12.583 | 5.752 | -1.129 | 3.24E-05 | 1.05E-04 | SLC39A4 | 563.016 | 1528.924 | 1.441 | 7.11E-06 | 2.64E-05 |
| OMD | 33.634 | 15.391 | -1.128 | 0.000463 | 0.001158 | TRNP1 | 545.235 | 1480.815 | 1.441 | 2.63E-06 | 1.07E-05 |
| GYS2 | 2715.376 | 1242.870 | -1.127 | 9.71E-09 | 6.45E-08 | FUT7 | 8.366 | 22.764 | 1.444 | 2.31E-06 | 9.45E-06 |
| AJAP1 | 31.310 | 14.385 | -1.122 | 3.19E-05 | 0.000104 | FUT5 | 2.081 | 5.673 | 1.447 | 4.96E-04 | 1.23E-03 |
| DAAM2 | 527.613 | 242.525 | -1.121 | 3.79E-13 | 6.15E-12 | VWA5B2 | 13.198 | 35.993 | 1.447 | 2.08E-07 | 1.04E-06 |
| FAM198A | 243.056 | 111.737 | -1.121 | 1.78E-04 | 4.93E-04 | GUCY2D | 22.652 | 62.138 | 1.456 | 1.83E-03 | 3.97E-03 |
| CRIM1 | 2939.153 | 1355.584 | -1.116 | 2.59E-11 | 2.87E-10 | AL159163.1 | 5.303 | 14.616 | 1.463 | 1.93E-11 | 2.20E-10 |
| AASS | 1212.993 | 560.733 | -1.113 | 3.77E-16 | 1.22E-14 | MISP | 233.011 | 643.866 | 1.466 | 0.000329 | 0.000858 |
| AP001931.1 | 4.217 | 1.951 | -1.112 | 7.57E-11 | 7.68E-10 | IL17B | 1.703 | 4.708 | 1.467 | 7.83E-09 | 5.29E-08 |
| RAB19 | 6.587 | 3.048 | -1.112 | 3.80E-04 | 9.71E-04 | SCT | 5.559 | 15.379 | 1.468 | 2.46E-04 | 6.61E-04 |
| USH2A | 604.885 | 279.926 | -1.112 | 2.41E-04 | 6.49E-04 | EXOSC4 | 1069.973 | 2962.130 | 1.469 | 3.33E-25 | 1.92E-22 |
| INHBC | 2770.890 | 1282.684 | -1.111 | 1.10E-14 | 2.45E-13 | TRIM54 | 43.226 | 119.673 | 1.469 | 1.04E-05 | 3.75E-05 |
| ANXA10 | 1003.717 | 465.708 | -1.108 | 1.17E-07 | 6.21E-07 | LYZL2 | 1.305 | 3.667 | 1.491 | 1.91E-02 | 3.22E-02 |
| DACH1 | 31.131 | 14.532 | -1.099 | 7.71E-07 | 3.46E-06 | CRYGS | 67.982 | 191.293 | 1.493 | 2.35E-08 | 1.44E-07 |
| CHST9 | 911.958 | 426.117 | -1.098 | 2.66E-08 | 1.61E-07 | RS1 | 2.766 | 7.811 | 1.498 | 4.19E-04 | 1.06E-03 |
| POU3F1 | 9.902 | 4.631 | -1.096 | 2.84E-03 | 5.93E-03 | STRA8 | 5.912 | 16.745 | 1.502 | 3.66E-08 | 2.15E-07 |
| LINC00675 | 15.518 | 7.266 | -1.095 | 7.38E-03 | 1.39E-02 | PLEKHB1 | 169.382 | 480.323 | 1.504 | 1.01E-04 | 2.95E-04 |
| EPHA3 | 316.132 | 148.231 | -1.093 | 9.44E-07 | 4.15E-06 | PLAC9 | 134.105 | 380.874 | 1.506 | 0.002119 | 0.004552 |
| SLC5A4 | 14.352 | 6.733 | -1.092 | 1.97E-11 | 2.22E-10 | AC010325.1 | 1.158 | 3.304 | 1.512 | 0.00011 | 0.000319 |
| SEC14L3 | 79.634 | 37.369 | -1.092 | 1.33E-07 | 6.99E-07 | HPDL | 12.408 | 35.506 | 1.517 | 4.46E-04 | 1.12E-03 |
| CIDEB | 43.684 | 20.521 | -1.090 | 1.63E-18 | 9.72E-17 | SSUH2 | 143.697 | 415.071 | 1.530 | 1.09E-07 | 5.82E-07 |
| SLCO1A2 | 429.831 | 202.013 | -1.089 | 4.37E-03 | 8.70E-03 | MT1H | 606.422 | 1763.712 | 1.540 | 0.00434 | 0.008655 |
| AC022335.1 | 8.393 | 3.949 | -1.088 | 2.59E-12 | 3.45E-11 | NPAS1 | 23.133 | 67.380 | 1.542 | 1.25E-05 | 4.40E-05 |
| EXPH5 | 363.985 | 171.404 | -1.086 | 1.18E-10 | 1.15E-09 | SPOCD1 | 17.335 | 50.624 | 1.546 | 0.00022 | 0.000597 |
| GPR174 | 13.303 | 6.277 | -1.084 | 4.72E-05 | 0.000148 | LMO3 | 13.615 | 40.295 | 1.565 | 2.90E-06 | 1.16E-05 |
| HSPG2 | 5274.484 | 2489.874 | -1.083 | 4.56E-14 | 8.87E-13 | REG4 | 24.712 | 74.098 | 1.584 | 0.031011 | 0.049308 |
| PGR | 57.894 | 27.371 | -1.081 | 4.04E-08 | 2.34E-07 | NT5DC4 | 3.221 | 9.675 | 1.587 | 3.38E-04 | 8.78E-04 |
| XDH | 3850.995 | 1821.839 | -1.080 | 8.80E-11 | 8.80E-10 | UCN2 | 2.764 | 8.315 | 1.589 | 9.82E-03 | 1.78E-02 |
| BCO2 | 395.358 | 187.493 | -1.076 | 2.49E-10 | 2.27E-09 | FER1L5 | 7.278 | 22.109 | 1.603 | 0.003268 | 0.006731 |
| STS | 1521.562 | 724.100 | -1.071 | 0.000535 | 0.001317 | PTHLH | 74.895 | 227.728 | 1.604 | 4.17E-03 | 8.36E-03 |
| PDK4 | 9891.261 | 4712.252 | -1.070 | 1.10E-14 | 2.45E-13 | HHIPL2 | 118.646 | 361.892 | 1.609 | 0.00016 | 0.000449 |
| ZNF385D | 327.146 | 155.984 | -1.069 | 1.27E-02 | 2.25E-02 | TNNT1 | 37.301 | 114.697 | 1.621 | 2.27E-03 | 4.84E-03 |
| LUZP2 | 69.200 | 32.996 | -1.068 | 2.35E-04 | 6.35E-04 | UPK1A | 12.347 | 38.359 | 1.635 | 3.14E-03 | 0.006499 |
| FREM2 | 189.491 | 90.530 | -1.066 | 0.009359 | 0.01713 | BSND | 3.119 | 9.770 | 1.647 | 1.07E-07 | 5.72E-07 |
| OR2C1 | 2.482 | 1.188 | -1.063 | 3.24E-09 | 2.36E-08 | TM4SF19 | 8.792 | 27.551 | 1.648 | 6.08E-04 | 1.48E-03 |
| ACER2 | 42.425 | 20.330 | -1.061 | 2.13E-14 | 4.50E-13 | BARX1 | 17.784 | 56.384 | 1.665 | 6.87E-06 | 2.56E-05 |
| ST6GAL2 | 65.821 | 31.580 | -1.060 | 0.000464 | 0.001159 | STEAP1B | 7.444 | 23.601 | 1.665 | 4.62E-04 | 1.15E-03 |
| GPR75 | 64.288 | 30.875 | -1.058 | 2.16E-12 | 2.92E-11 | CIB3 | 1.134 | 3.599 | 1.666 | 1.26E-05 | 4.44E-05 |
| ELFN1 | 1217.205 | 584.863 | -1.057 | 1.15E-06 | 4.95E-06 | CCL26 | 9.081 | 28.861 | 1.668 | 1.20E-03 | 2.74E-03 |
| TERB2 | 24.123 | 11.594 | -1.057 | 1.15E-02 | 2.05E-02 | MSI1 | 172.182 | 547.387 | 1.669 | 5.19E-11 | 5.43E-10 |
| KLRC4 | 1.327 | 0.638 | -1.057 | 3.30E-03 | 6.79E-03 | KISS1R | 9.453 | 30.246 | 1.678 | 0.012598 | 0.022262 |
| MUSK | 13.098 | 6.296 | -1.057 | 1.54E-02 | 2.66E-02 | MYBPHL | 14.452 | 46.516 | 1.686 | 1.15E-02 | 0.02045 |
| IRGM | 8.066 | 3.882 | -1.055 | 0.015347 | 0.02651 | TMEM158 | 32.594 | 105.028 | 1.688 | 6.04E-05 | 0.000185 |
| FAT3 | 34.093 | 16.412 | -1.055 | 0.000562 | 0.001378 | CLIC3 | 31.556 | 102.404 | 1.698 | 8.58E-05 | 0.000254 |
| DDX53 | 40.080 | 19.305 | -1.054 | 0.006067 | 0.011669 | CD70 | 9.609 | 31.232 | 1.701 | 0.000932 | 0.002177 |
| RNF150 | 100.301 | 48.350 | -1.053 | 0.000327 | 0.000853 | PPP1R14D | 22.082 | 72.878 | 1.723 | 0.005374 | 0.010492 |
| MSANTD3-TMEFF1 | 1.668 | 0.804 | -1.052 | 1.22E-08 | 7.87E-08 | CAGE1 | 3.668 | 12.176 | 1.731 | 0.00206 | 0.004437 |
| HIST1H2AI | 15.002 | 7.238 | -1.051 | 0.007439 | 0.013966 | DQX1 | 50.070 | 167.239 | 1.740 | 0.0002 | 0.000548 |
| NAT2 | 442.507 | 213.991 | -1.048 | 2.43E-05 | 8.11E-05 | DGKK | 10.393 | 34.955 | 1.750 | 7.83E-04 | 1.86E-03 |
| CES4A | 376.581 | 182.158 | -1.048 | 1.94E-06 | 8.04E-06 | TLX2 | 2.601 | 8.759 | 1.751 | 1.13E-02 | 2.01E-02 |
| KCNK17 | 51.395 | 24.864 | -1.048 | 0.012623 | 0.022299 | FABP3 | 180.709 | 609.104 | 1.753 | 5.17E-05 | 1.60E-04 |
| SELE | 176.384 | 85.376 | -1.047 | 1.05E-02 | 1.89E-02 | CD7 | 238.669 | 810.507 | 1.764 | 4.55E-07 | 2.13E-06 |
| SLC24A3 | 85.559 | 41.446 | -1.046 | 0.004641 | 0.009191 | LCN2 | 5127.669 | 17418.686 | 1.764 | 1.46E-06 | 6.22E-06 |
| LRRC55 | 19.602 | 9.513 | -1.043 | 4.77E-04 | 0.001187 | ART5 | 6.926 | 24.024 | 1.794 | 0.023337 | 0.038423 |
| CCDC141 | 24.258 | 11.778 | -1.042 | 7.40E-04 | 1.77E-03 | C7orf61 | 4.443 | 15.445 | 1.798 | 1.58E-06 | 6.66E-06 |
| CA4 | 94.573 | 45.919 | -1.042 | 0.003051 | 0.006332 | SPINK1 | 7709.517 | 26930.550 | 1.805 | 9.77E-12 | 1.17E-10 |
| NTN3 | 15.750 | 7.648 | -1.042 | 9.79E-10 | 7.91E-09 | FXYD3 | 190.105 | 667.608 | 1.812 | 2.79E-03 | 5.83E-03 |
| PTCHD4 | 113.318 | 55.053 | -1.041 | 1.38E-04 | 3.93E-04 | NR5A1 | 2.739 | 9.667 | 1.820 | 5.30E-06 | 2.01E-05 |
| HORMAD2 | 67.030 | 32.702 | -1.035 | 0.002557 | 0.005393 | SPINK4 | 6.767 | 24.104 | 1.833 | 9.12E-04 | 2.14E-03 |
| TTC36 | 929.822 | 454.119 | -1.034 | 7.00E-07 | 3.16E-06 | FAM159B | 0.700 | 2.514 | 1.844 | 1.78E-03 | 3.87E-03 |
| TMC3 | 12.848 | 6.283 | -1.032 | 8.68E-04 | 2.04E-03 | TRIM71 | 173.553 | 629.254 | 1.858 | 3.51E-09 | 2.53E-08 |
| UGT1A4 | 3898.014 | 1907.186 | -1.031 | 3.13E-05 | 1.02E-04 | S100A8 | 108.556 | 397.218 | 1.871 | 3.76E-03 | 7.62E-03 |
| LGSN | 167.852 | 82.145 | -1.031 | 7.63E-07 | 3.43E-06 | SNCG | 550.834 | 2035.709 | 1.886 | 8.45E-06 | 3.10E-05 |
| DEFB132 | 111.642 | 54.638 | -1.031 | 2.10E-03 | 4.52E-03 | MSC | 339.889 | 1261.102 | 1.892 | 0.002197 | 0.004705 |
| CELA2B | 2.973 | 1.455 | -1.031 | 2.03E-05 | 6.89E-05 | SOAT2 | 208.690 | 775.525 | 1.894 | 1.88E-09 | 1.43E-08 |
| KCNA3 | 15.213 | 7.448 | -1.030 | 1.32E-04 | 3.76E-04 | TNNI2 | 42.914 | 161.802 | 1.915 | 2.64E-06 | 1.07E-05 |
| CPED1 | 768.518 | 376.361 | -1.030 | 1.07E-10 | 1.05E-09 | BPIFA2 | 8.779 | 33.681 | 1.940 | 0.00013 | 0.000371 |
| NT5C1B | 12.133 | 5.945 | -1.029 | 4.68E-16 | 1.47E-14 | MCCD1 | 47.727 | 183.910 | 1.946 | 9.81E-04 | 0.002283 |
| PTGS2 | 61.808 | 30.293 | -1.029 | 0.015124 | 0.026165 | CERS1 | 17.371 | 67.084 | 1.949 | 6.90E-09 | 4.69E-08 |
| SLC10A6 | 9.676 | 4.747 | -1.027 | 4.13E-11 | 4.40E-10 | CRYGN | 1.167 | 4.534 | 1.958 | 1.55E-02 | 0.02668 |
| PSD3 | 1786.103 | 876.545 | -1.027 | 5.32E-18 | 2.75E-16 | DUSP9 | 534.331 | 2092.064 | 1.969 | 2.10E-07 | 1.05E-06 |
| PDILT | 3.282 | 1.611 | -1.026 | 1.08E-06 | 4.69E-06 | HMGA2 | 62.272 | 245.128 | 1.977 | 0.00561 | 0.010893 |
| EPB41L4A | 151.082 | 74.276 | -1.024 | 2.07E-10 | 1.91E-09 | PNMA3 | 117.823 | 466.017 | 1.984 | 2.90E-03 | 6.05E-03 |
| LIFR | 687.151 | 337.984 | -1.024 | 1.05E-06 | 4.60E-06 | VGF | 21.969 | 88.339 | 2.008 | 1.71E-05 | 5.91E-05 |
| MMP24 | 240.610 | 118.692 | -1.019 | 1.51E-03 | 3.34E-03 | PNCK | 82.076 | 353.129 | 2.105 | 0.001207 | 0.00274 |
| AL132639.3 | 33.120 | 16.344 | -1.019 | 1.09E-19 | 9.00E-18 | S100A9 | 461.347 | 2013.534 | 2.126 | 0.000374 | 0.000958 |
| ERICH3 | 16.434 | 8.110 | -1.019 | 1.42E-06 | 6.03E-06 | POPDC3 | 20.222 | 89.793 | 2.151 | 4.08E-04 | 1.03E-03 |
| DCN | 4289.489 | 2118.836 | -1.018 | 3.47E-04 | 8.99E-04 | C11orf86 | 3.745 | 16.849 | 2.170 | 8.08E-04 | 1.92E-03 |
| ZNF770 | 888.248 | 438.966 | -1.017 | 1.05E-20 | 1.19E-18 | CXCL17 | 48.096 | 216.473 | 2.170 | 6.07E-08 | 3.41E-07 |
| DLGAP2 | 10.897 | 5.404 | -1.012 | 0.00149 | 0.003307 | S100P | 1176.200 | 5421.163 | 2.204 | 6.15E-08 | 3.45E-07 |
| HSD3B2 | 13.543 | 6.724 | -1.010 | 0.000125 | 0.000359 | SSTR3 | 5.341 | 25.006 | 2.227 | 3.82E-06 | 1.50E-05 |
| CBSL | 115.027 | 57.126 | -1.010 | 1.19E-03 | 2.71E-03 | SLC22A8 | 18.095 | 85.470 | 2.240 | 0.000244 | 0.000656 |
| LYVE1 | 312.320 | 155.305 | -1.008 | 2.13E-03 | 4.58E-03 | ACTL8 | 35.408 | 168.075 | 2.247 | 2.80E-05 | 9.21E-05 |
| RBL2 | 2474.694 | 1232.672 | -1.005 | 1.86E-26 | 1.84E-23 | FABP6 | 7.357 | 34.944 | 2.248 | 1.87E-04 | 5.17E-04 |
| CNTN5 | 15.528 | 7.743 | -1.004 | 1.16E-02 | 2.06E-02 | SBSN | 4.328 | 21.528 | 2.315 | 3.78E-04 | 9.67E-04 |
| ABCB11 | 2193.279 | 1094.933 | -1.002 | 6.44E-07 | 2.94E-06 | BPIFB2 | 254.098 | 1401.186 | 2.463 | 3.16E-04 | 8.28E-04 |
| GCK | 1058.550 | 528.510 | -1.002 | 0.00451 | 0.008951 | SLC6A14 | 10.929 | 67.067 | 2.617 | 5.86E-04 | 1.43E-03 |
| CCSER1 | 11.261 | 5.625 | -1.001 | 1.30E-03 | 2.93E-03 | CALCA | 91.104 | 573.326 | 2.654 | 0.000141 | 0.0004 |
| AKR1D1 | 4015.148 | 2005.871 | -1.001 | 6.06E-05 | 0.000185 | CLEC2L | 15.412 | 98.543 | 2.677 | 0.006372 | 0.012178 |
| C15orf38-AP3S2 | 7.550 | 3.772 | -1.001 | 1.80E-13 | 3.10E-12 | BIRC7 | 9.673 | 62.271 | 2.687 | 1.39E-05 | 4.86E-05 |
| RETREG1 | 934.872 | 467.185 | -1.001 | 1.96E-07 | 9.92E-07 | NKAIN4 | 2.242 | 14.496 | 2.693 | 7.06E-05 | 2.13E-04 |
| LRP2 | 86.576 | 173.174 | 1.000 | 1.83E-02 | 3.10E-02 | CAMKV | 2.663 | 17.342 | 2.703 | 0.008247 | 0.015324 |
| TRIM16 | 574.328 | 1148.897 | 1.000 | 4.59E-10 | 3.97E-09 | APCDD1L | 2.852 | 19.080 | 2.742 | 1.77E-02 | 3.00E-02 |
| HSD17B1 | 71.958 | 143.960 | 1.000 | 0.000165 | 0.000461 | SLC6A3 | 8.585 | 58.085 | 2.758 | 0.030704 | 0.048878 |
| LINC00694 | 30.655 | 61.352 | 1.001 | 2.36E-08 | 1.44E-07 | UCHL1 | 176.229 | 1269.708 | 2.849 | 2.27E-02 | 0.03746 |
| C19orf24 | 2001.020 | 4010.151 | 1.003 | 1.89E-17 | 8.40E-16 | GJB6 | 8.510 | 61.680 | 2.858 | 0.027647 | 0.044611 |
| TOP1MT | 1477.793 | 2965.263 | 1.005 | 1.23E-22 | 2.56E-20 | DLL3 | 1.561 | 12.865 | 3.043 | 2.21E-05 | 7.46E-05 |
| HGH1 | 1589.878 | 3199.585 | 1.009 | 5.88E-23 | 1.45E-20 | CUZD1 | 13.377 | 124.836 | 3.222 | 2.48E-02 | 4.06E-02 |
| RPS12 | 19250.129 | 38748.093 | 1.009 | 2.45E-15 | 6.44E-14 | RBP2 | 9.217 | 96.782 | 3.392 | 2.87E-02 | 4.60E-02 |
| NUDT1 | 338.831 | 682.043 | 1.009 | 2.04E-14 | 4.32E-13 | DUSP13 | 3.853 | 41.532 | 3.430 | 5.93E-05 | 0.000182 |
| NDUFB9 | 8098.715 | 16307.633 | 1.010 | 3.27E-18 | 1.76E-16 | AFP | 5192.853 | 62539.093 | 3.590 | 3.24E-07 | 1.57E-06 |
| RPL37 | 20163.958 | 40612.735 | 1.010 | 1.04E-20 | 1.19E-18 | CRYBA2 | 2.221 | 32.977 | 3.892 | 1.21E-04 | 3.49E-04 |
| COX6C | 8382.853 | 16906.692 | 1.012 | 1.38E-14 | 3.02E-13 | CHGA | 26.606 | 499.167 | 4.230 | 0.004021 | 0.008094 |
| C19orf48 | 1691.982 | 3412.738 | 1.012 | 2.26E-18 | 1.29E-16 | CPA2 | 22.733 | 486.386 | 4.419 | 8.62E-03 | 0.015938 |
| ARL9 | 3.628 | 7.319 | 1.012 | 1.10E-05 | 3.94E-05 | MATN4 | 2.846 | 68.168 | 4.582 | 6.23E-05 | 0.00019 |

**Table S10. Co-expressed genes of *PUS1* in GSE14520 cohort**

| **Gene** | **correlation** | **p-value** | **Gene** | **correlation** | **p-value** | **Gene** | **correlation** | **p-value** | **Gene** | **correlation** | **p-value** |
| --- | --- | --- | --- | --- | --- | --- | --- | --- | --- | --- | --- |
| SNRPF | 0.594 | 1.44E-21 | BAT2D1 | 0.435 | 3.19E-11 | TRIM28 | 0.404 | 1.00E-09 | DEXI | -0.430 | 6.28E-11 |
| GOLGA3 | 0.571 | 9.00E-20 | SNHG3 | 0.435 | 3.22E-11 | SNRPE | 0.404 | 1.03E-09 | NAT2 | -0.430 | 6.18E-11 |
| DENR | 0.559 | 7.96E-19 | TETRAN | 0.435 | 3.42E-11 | HEATR1 | 0.403 | 1.08E-09 | ADH1B | -0.431 | 5.53E-11 |
| UBAP2 | 0.547 | 6.30E-18 | ACSL4 | 0.434 | 3.90E-11 | KIAA0907 | 0.402 | 1.24E-09 | COPZ2 | -0.431 | 5.51E-11 |
| KIAA0692 | 0.539 | 2.28E-17 | ZNF692 | 0.434 | 3.91E-11 | CD81 | -0.400 | 1.49E-09 | LAMP2 | -0.431 | 5.39E-11 |
| MARS | 0.539 | 2.40E-17 | PTBP1 | 0.433 | 4.32E-11 | MPDZ | -0.400 | 1.44E-09 | NDRG2 | -0.431 | 5.14E-11 |
| ATF4 | 0.534 | 5.38E-17 | YARS2 | 0.431 | 5.03E-11 | PCAF | -0.401 | 1.33E-09 | CYP3A43 | -0.432 | 4.88E-11 |
| PFAS | 0.522 | 3.18E-16 | LOC641903 | 0.431 | 5.17E-11 | IGFBP4 | -0.402 | 1.22E-09 | SHMT1 | -0.432 | 4.70E-11 |
| CKAP4 | 0.522 | 3.19E-16 | FLJ10241 | 0.431 | 5.36E-11 | CYP3A4 | -0.402 | 1.22E-09 | TMEM47 | -0.432 | 4.68E-11 |
| AFP | 0.511 | 1.58E-15 | NOL1 | 0.431 | 5.59E-11 | CPEB3 | -0.402 | 1.19E-09 | UQCRC2 | -0.432 | 4.62E-11 |
| GTPBP9 | 0.511 | 1.59E-15 | PELP1 | 0.430 | 5.90E-11 | TAT | -0.403 | 1.15E-09 | IRF6 | -0.433 | 4.20E-11 |
| FAM60A | 0.511 | 1.64E-15 | RPL14 | 0.429 | 6.42E-11 | ATP6V0E2 | -0.403 | 1.11E-09 | ALDH7A1 | -0.433 | 4.03E-11 |
| GCN1L1 | 0.508 | 2.45E-15 | RPLP0 | 0.428 | 7.15E-11 | MYO1B | -0.404 | 9.53E-10 | ANXA10 | -0.434 | 3.60E-11 |
| NACA | 0.506 | 3.50E-15 | CDC20 | 0.428 | 7.46E-11 | TSC22D3 | -0.405 | 9.25E-10 | UQCRQ | -0.435 | 3.40E-11 |
| RNF34 | 0.503 | 5.03E-15 | HDAC2 | 0.427 | 8.28E-11 | PNPLA4 | -0.405 | 8.97E-10 | DHRS1 | -0.435 | 3.27E-11 |
| ANAPC5 | 0.499 | 8.97E-15 | SAE2 | 0.427 | 8.36E-11 | ABCB11 | -0.405 | 8.89E-10 | NDUFA5 | -0.437 | 2.59E-11 |
| ZRF1 | 0.498 | 1.07E-14 | ABCC10 | 0.427 | 8.56E-11 | ZNF688 | -0.405 | 8.83E-10 | FLJ20581 | -0.438 | 2.36E-11 |
| TDG | 0.497 | 1.32E-14 | PLXND1 | 0.427 | 8.75E-11 | WDR7 | -0.407 | 7.66E-10 | TMEM16A | -0.438 | 2.32E-11 |
| PPAT | 0.496 | 1.41E-14 | U1SNRNPBP | 0.425 | 1.06E-10 | MYLK | -0.407 | 7.60E-10 | SYBL1 | -0.438 | 2.28E-11 |
| TUBB2C | 0.492 | 2.54E-14 | DKFZp762E1312 | 0.425 | 1.08E-10 | TOM1L1 | -0.408 | 6.56E-10 | SEC14L2 | -0.439 | 2.21E-11 |
| JOSD3 | 0.492 | 2.70E-14 | ATXN2 | 0.424 | 1.10E-10 | LOC123876 | -0.408 | 6.55E-10 | HSD11B1 | -0.439 | 2.15E-11 |
| SSB | 0.489 | 3.60E-14 | MARCKSL1 | 0.424 | 1.11E-10 | EHHADH | -0.408 | 6.55E-10 | EPHX2 | -0.439 | 2.14E-11 |
| JARID2 | 0.489 | 3.80E-14 | VPS37C | 0.424 | 1.16E-10 | BHMT | -0.409 | 5.91E-10 | NR1I2 | -0.439 | 2.05E-11 |
| SFRS8 | 0.488 | 4.16E-14 | DHX34 | 0.424 | 1.18E-10 | CG018 | -0.410 | 5.35E-10 | MAN1C1 | -0.440 | 1.81E-11 |
| CHD7 | 0.484 | 7.70E-14 | BZW2 | 0.423 | 1.30E-10 | NDFIP1 | -0.410 | 5.26E-10 | SLC22A1 | -0.441 | 1.73E-11 |
| TRMT1 | 0.483 | 9.04E-14 | PDE9A | 0.423 | 1.36E-10 | RNF14 | -0.410 | 5.20E-10 | GYS2 | -0.441 | 1.68E-11 |
| EP400 | 0.482 | 9.52E-14 | C4orf8 | 0.422 | 1.40E-10 | CTSF | -0.410 | 5.13E-10 | KIAA0430 | -0.441 | 1.60E-11 |
| YEATS2 | 0.481 | 1.16E-13 | DDX39 | 0.422 | 1.46E-10 | UGT2B15 | -0.411 | 4.92E-10 | MAT2B | -0.442 | 1.57E-11 |
| PPP1CC | 0.479 | 1.51E-13 | PDCD11 | 0.422 | 1.47E-10 | ALDH5A1 | -0.411 | 4.81E-10 | GLYAT | -0.448 | 7.09E-12 |
| FIP1L1 | 0.478 | 1.60E-13 | TMEM113 | 0.421 | 1.61E-10 | ALAD | -0.411 | 4.64E-10 | CTSO | -0.449 | 6.28E-12 |
| IGF2BP2 | 0.477 | 1.86E-13 | C22orf9 | 0.421 | 1.62E-10 | FLJ20366 | -0.412 | 4.40E-10 | DCXR | -0.450 | 5.99E-12 |
| CLIC1 | 0.471 | 4.17E-13 | ROBO1 | 0.421 | 1.69E-10 | HBP1 | -0.412 | 4.22E-10 | ITFG1 | -0.452 | 4.65E-12 |
| HIC2 | 0.471 | 4.19E-13 | SMOX | 0.419 | 2.06E-10 | PEX19 | -0.412 | 4.12E-10 | HSD17B6 | -0.454 | 3.60E-12 |
| PHF21A | 0.470 | 4.53E-13 | POLR2H | 0.419 | 2.11E-10 | RANBP10 | -0.413 | 3.80E-10 | PRKAG2 | -0.455 | 3.15E-12 |
| NOL5A | 0.467 | 6.76E-13 | UBE2E1 | 0.419 | 2.11E-10 | DNASE1L3 | -0.414 | 3.62E-10 | KLF9 | -0.455 | 2.99E-12 |
| ARHGEF2 | 0.467 | 7.06E-13 | H2AFX | 0.418 | 2.21E-10 | IFIT2 | -0.414 | 3.49E-10 | SRR | -0.458 | 2.17E-12 |
| GNL3 | 0.466 | 8.15E-13 | PABPC3 | 0.418 | 2.34E-10 | SLC35D1 | -0.415 | 3.18E-10 | PSMA2 | -0.459 | 1.98E-12 |
| IARS | 0.465 | 9.24E-13 | UCK2 | 0.418 | 2.36E-10 | CCDC28A | -0.415 | 3.13E-10 | HAO1 | -0.460 | 1.76E-12 |
| ZNF84 | 0.465 | 9.52E-13 | LOC730051 | 0.417 | 2.38E-10 | SAR1B | -0.415 | 3.07E-10 | C16orf45 | -0.461 | 1.47E-12 |
| NCL | 0.464 | 1.04E-12 | RPSA | 0.417 | 2.50E-10 | GHR | -0.415 | 2.99E-10 | CALCOCO2 | -0.461 | 1.47E-12 |
| PPRC1 | 0.463 | 1.15E-12 | EIF5B | 0.417 | 2.64E-10 | IL13RA1 | -0.416 | 2.76E-10 | CTBS | -0.461 | 1.41E-12 |
| WHSC1 | 0.463 | 1.18E-12 | TARS | 0.416 | 2.71E-10 | SLC27A5 | -0.416 | 2.66E-10 | CES2 | -0.463 | 1.15E-12 |
| GTSE1 | 0.461 | 1.51E-12 | FLJ11021 | 0.416 | 2.73E-10 | AQP9 | -0.417 | 2.64E-10 | ACADL | -0.464 | 9.64E-13 |
| PUS7 | 0.461 | 1.51E-12 | SETD1B | 0.415 | 3.16E-10 | VKORC1 | -0.418 | 2.27E-10 | SRD5A1 | -0.466 | 8.23E-13 |
| E2F3 | 0.459 | 1.94E-12 | RACGAP1 | 0.414 | 3.45E-10 | HAAO | -0.418 | 2.24E-10 | CBR1 | -0.469 | 5.72E-13 |
| DUSP9 | 0.458 | 2.19E-12 | HMGA2 | 0.414 | 3.57E-10 | MYRIP | -0.418 | 2.19E-10 | GADD45A | -0.469 | 5.58E-13 |
| C11orf48 | 0.457 | 2.52E-12 | SART3 | 0.414 | 3.64E-10 | MAP3K5 | -0.419 | 2.10E-10 | HAGH | -0.473 | 3.20E-13 |
| GMPS | 0.456 | 2.68E-12 | SMG5 | 0.413 | 3.83E-10 | PARP3 | -0.420 | 1.88E-10 | PINK1 | -0.474 | 2.77E-13 |
| NCAPD2 | 0.456 | 2.83E-12 | FGFR3 | 0.413 | 3.84E-10 | ADH1A | -0.421 | 1.64E-10 | ACYP2 | -0.476 | 2.12E-13 |
| ZNF587 | 0.455 | 3.06E-12 | UBAP2L | 0.413 | 3.90E-10 | HSD17B8 | -0.422 | 1.46E-10 | FBXO3 | -0.476 | 2.05E-13 |
| BLM | 0.452 | 4.57E-12 | SAC3D1 | 0.413 | 3.94E-10 | FAAH | -0.423 | 1.37E-10 | XDH | -0.478 | 1.72E-13 |
| HOMER1 | 0.452 | 4.61E-12 | NAP1L1 | 0.413 | 3.96E-10 | FMO3 | -0.423 | 1.37E-10 | BTD | -0.480 | 1.32E-13 |
| TACC3 | 0.450 | 5.96E-12 | HNRPA1 | 0.412 | 4.36E-10 | RHCE | -0.423 | 1.35E-10 | NNT | -0.480 | 1.27E-13 |
| NCAPG | 0.449 | 6.35E-12 | TUBB3 | 0.412 | 4.40E-10 | PER3 | -0.423 | 1.30E-10 | PDK2 | -0.481 | 1.16E-13 |
| FBXO46 | 0.449 | 6.61E-12 | HNRPL | 0.411 | 4.75E-10 | BLVRB | -0.423 | 1.28E-10 | WDR23 | -0.483 | 8.54E-14 |
| SNRPG | 0.447 | 8.43E-12 | PLK1 | 0.411 | 4.75E-10 | CNOT8 | -0.424 | 1.20E-10 | FLJ10986 | -0.484 | 7.89E-14 |
| AACS | 0.447 | 8.47E-12 | SMARCC1 | 0.410 | 5.38E-10 | PCCA | -0.424 | 1.18E-10 | ACADM | -0.488 | 4.65E-14 |
| ATP2B1 | 0.445 | 1.03E-11 | TSR1 | 0.409 | 6.07E-10 | SLC35A3 | -0.424 | 1.15E-10 | PGRMC1 | -0.488 | 4.28E-14 |
| FNBP4 | 0.441 | 1.67E-11 | SFI1 | 0.409 | 6.14E-10 | PJA2 | -0.424 | 1.15E-10 | SLC10A1 | -0.491 | 2.92E-14 |
| CCT3 | 0.440 | 1.96E-11 | PAK1IP1 | 0.408 | 6.41E-10 | AKR7A2 | -0.425 | 1.10E-10 | AKR7A3 | -0.498 | 1.10E-14 |
| ANP32B | 0.439 | 2.14E-11 | NXT1 | 0.408 | 6.66E-10 | SDHB | -0.425 | 1.09E-10 | CREBL2 | -0.499 | 9.35E-15 |
| SNRPA | 0.438 | 2.29E-11 | MAML1 | 0.408 | 6.74E-10 | CYP2C8 | -0.425 | 1.04E-10 | PDK4 | -0.503 | 5.56E-15 |
| C11orf10 | 0.438 | 2.32E-11 | C17orf63 | 0.407 | 6.93E-10 | APBB3 | -0.426 | 9.32E-11 | NR3C1 | -0.507 | 3.06E-15 |
| NACAP1 | 0.436 | 2.89E-11 | ASNS | 0.406 | 7.71E-10 | CAT | -0.427 | 8.39E-11 | DSCR1 | -0.508 | 2.62E-15 |
| DDX54 | 0.436 | 2.93E-11 | PWCR1 | 0.406 | 8.47E-10 | UGP2 | -0.428 | 7.70E-11 | SCP2 | -0.512 | 1.41E-15 |
| GNB2L1 | 0.436 | 2.99E-11 | SR140 | 0.405 | 8.75E-10 | SUCLG2 | -0.428 | 7.65E-11 | FMO4 | -0.522 | 3.13E-16 |
| FLJ14668 | 0.436 | 3.11E-11 | TRIP13 | 0.404 | 9.59E-10 | PEX12 | -0.429 | 6.96E-11 | F8 | -0.549 | 4.28E-18 |

**Table S11. Differential genes between high and low *PUS1* groups in GSE14520 cohort**

| **Gene** | **lowMean** | **highMean** | **LogFC** | **p-Value** | **FDR** | **Gene** | **lowMean** | **highMean** | **LogFC** | **p-Value** | **FDR** |
| --- | --- | --- | --- | --- | --- | --- | --- | --- | --- | --- | --- |
| SLC10A1 | 9.078822 | 6.98913 | -2.08969 | 6.54E-10 | 2.31E-07 | PDK4 | 5.778791 | 4.68058 | -1.09821 | 2.14E-09 | 5.06E-07 |
| SLC22A1 | 7.361892 | 5.341622 | -2.02027 | 2.33E-08 | 2.68E-06 | NAT2 | 5.721558 | 4.631948 | -1.08961 | 1.26E-07 | 8.07E-06 |
| HSD11B1 | 8.668251 | 6.871276 | -1.79697 | 1.35E-06 | 4.16E-05 | C7 | 6.318329 | 5.23574 | -1.08259 | 1.09E-05 | 0.000195 |
| CYP7A1 | 6.579045 | 4.950024 | -1.62902 | 4.82E-06 | 0.000105 | ALDOB | 10.6778 | 9.613267 | -1.06454 | 4.84E-06 | 0.000105 |
| HSD17B6 | 10.25957 | 8.630659 | -1.62891 | 5.51E-11 | 5.67E-08 | ABCB4 | 8.111144 | 7.049494 | -1.06165 | 1.90E-05 | 0.000295 |
| ADH1B | 10.42799 | 8.855178 | -1.57281 | 7.65E-08 | 5.78E-06 | UPB1 | 8.643624 | 7.583691 | -1.05993 | 3.80E-05 | 0.000514 |
| FLJ10986 | 7.458826 | 5.924338 | -1.53449 | 9.33E-09 | 1.38E-06 | SEC14L2 | 5.812975 | 4.76 | -1.05297 | 9.97E-09 | 1.43E-06 |
| AQP9 | 9.074773 | 7.54942 | -1.52535 | 8.71E-08 | 6.33E-06 | CYP1A2 | 6.057445 | 5.005387 | -1.05206 | 1.94E-06 | 5.43E-05 |
| BHMT | 9.651172 | 8.175009 | -1.47616 | 3.48E-08 | 3.43E-06 | CFHR4 | 9.106796 | 8.06093 | -1.04587 | 0.000189 | 0.001753 |
| GLYAT | 6.500482 | 5.065438 | -1.43504 | 9.80E-08 | 6.89E-06 | SLPI | 8.388033 | 7.347221 | -1.04081 | 0.002307 | 0.011719 |
| GNMT | 7.080677 | 5.67073 | -1.40995 | 2.59E-06 | 6.60E-05 | C6 | 9.447094 | 8.409445 | -1.03765 | 1.10E-05 | 0.000197 |
| CYP2A6 | 7.462248 | 6.072595 | -1.38965 | 2.85E-06 | 7.10E-05 | UGT2B15 | 7.335635 | 6.309929 | -1.02571 | 3.39E-09 | 7.11E-07 |
| FMO3 | 9.51136 | 8.129549 | -1.38181 | 4.49E-08 | 4.07E-06 | IFIT1 | 7.060264 | 6.034692 | -1.02557 | 7.79E-08 | 5.85E-06 |
| GYS2 | 6.918336 | 5.536711 | -1.38163 | 1.33E-07 | 8.29E-06 | HRG | 11.16736 | 10.14457 | -1.02278 | 1.30E-06 | 4.01E-05 |
| ADH1A | 8.946575 | 7.604618 | -1.34196 | 1.98E-08 | 2.44E-06 | EPHX2 | 7.304616 | 6.283006 | -1.02161 | 3.35E-08 | 3.36E-06 |
| HPR | 8.261462 | 6.920114 | -1.34135 | 1.42E-06 | 4.30E-05 | FLJ20366 | 6.834864 | 5.817477 | -1.01739 | 7.65E-08 | 5.78E-06 |
| HPD | 9.138536 | 7.802134 | -1.3364 | 0.00021 | 0.001893 | MYRIP | 5.683505 | 4.676272 | -1.00723 | 7.73E-07 | 2.76E-05 |
| AGXT2L1 | 8.184102 | 6.852801 | -1.3313 | 6.81E-06 | 0.000138 | GPC3 | 9.294332 | 10.3158 | 1.021467 | 0.003141 | 0.014804 |
| SPP2 | 8.424599 | 7.097686 | -1.32691 | 1.03E-05 | 0.000187 | TACSTD1 | 5.629427 | 6.658629 | 1.029201 | 0.002964 | 0.014198 |
| LOC123876 | 8.814693 | 7.527555 | -1.28714 | 4.07E-09 | 8.00E-07 | SLC38A1 | 5.693257 | 6.755389 | 1.062132 | 1.48E-07 | 8.67E-06 |
| HAO1 | 9.016254 | 7.744817 | -1.27144 | 1.88E-11 | 2.36E-08 | HMGA2 | 3.666459 | 4.748806 | 1.082347 | 1.07E-05 | 0.000193 |
| SDS | 7.473701 | 6.203806 | -1.2699 | 0.0003 | 0.002474 | STEAP1 | 5.295484 | 6.380919 | 1.085435 | 3.29E-06 | 7.89E-05 |
| APOC4 | 8.969663 | 7.728712 | -1.24095 | 9.27E-08 | 6.69E-06 | NTS | 4.147636 | 5.292246 | 1.144609 | 0.006384 | 0.025546 |
| HAO2 | 6.812799 | 5.585808 | -1.22699 | 2.54E-05 | 0.00037 | PEG3 | 4.534733 | 5.684959 | 1.150227 | 0.011653 | 0.040173 |
| SLC27A5 | 7.915094 | 6.688591 | -1.2265 | 4.08E-07 | 1.71E-05 | SPP1 | 7.891254 | 9.065034 | 1.17378 | 0.000704 | 0.00476 |
| AFM | 7.443506 | 6.218893 | -1.22461 | 4.15E-06 | 9.36E-05 | SULT1C1 | 5.053446 | 6.256097 | 1.20265 | 3.09E-08 | 3.18E-06 |
| TMEM16A | 6.141446 | 4.923668 | -1.21778 | 2.60E-07 | 1.30E-05 | ROBO1 | 8.109792 | 9.366625 | 1.256833 | 1.48E-07 | 8.67E-06 |
| GHR | 7.986806 | 6.783663 | -1.20314 | 4.98E-07 | 1.96E-05 | PEG10 | 6.760162 | 8.044851 | 1.284689 | 0.000446 | 0.003359 |
| DCXR | 10.15858 | 8.962002 | -1.19658 | 9.91E-10 | 3.03E-07 | IGF2BP2 | 6.39647 | 7.709644 | 1.313175 | 4.10E-09 | 8.00E-07 |
| RDH16 | 7.568639 | 6.392383 | -1.17626 | 4.33E-07 | 1.76E-05 | ACSL4 | 6.440982 | 7.914408 | 1.473426 | 3.25E-08 | 3.32E-06 |
| CES2 | 9.512964 | 8.33713 | -1.17583 | 1.34E-07 | 8.29E-06 | CCL20 | 6.487631 | 8.014135 | 1.526504 | 5.73E-07 | 2.16E-05 |
| FLJ20581 | 7.358393 | 6.183131 | -1.17526 | 5.00E-08 | 4.38E-06 | DKK1 | 4.739101 | 6.382945 | 1.643844 | 1.19E-07 | 7.85E-06 |
| CYP3A4 | 8.014856 | 6.847128 | -1.16773 | 2.13E-08 | 2.56E-06 | S100P | 5.619022 | 7.30285 | 1.683828 | 1.26E-05 | 0.00022 |
| LEPR | 7.51876 | 6.361952 | -1.15681 | 1.65E-06 | 4.80E-05 | SPINK1 | 8.481489 | 10.49025 | 2.008763 | 9.91E-06 | 0.000182 |
| PCK1 | 9.908928 | 8.774715 | -1.13421 | 0.000298 | 0.00246 | DLK1 | 4.740923 | 6.821406 | 2.080483 | 0.009 | 0.032932 |
| AKR7A3 | 7.012032 | 5.883343 | -1.12869 | 1.36E-07 | 8.30E-06 | AFP | 5.560953 | 8.405207 | 2.844254 | 1.36E-09 | 3.66E-07 |
| FMO4 | 6.882326 | 5.765978 | -1.11635 | 9.5E-11 | 7.69E-08 |  |  |  |  |  |  |

**Figure S1.** **Boxplot and survival plots of PUS enzymes.**


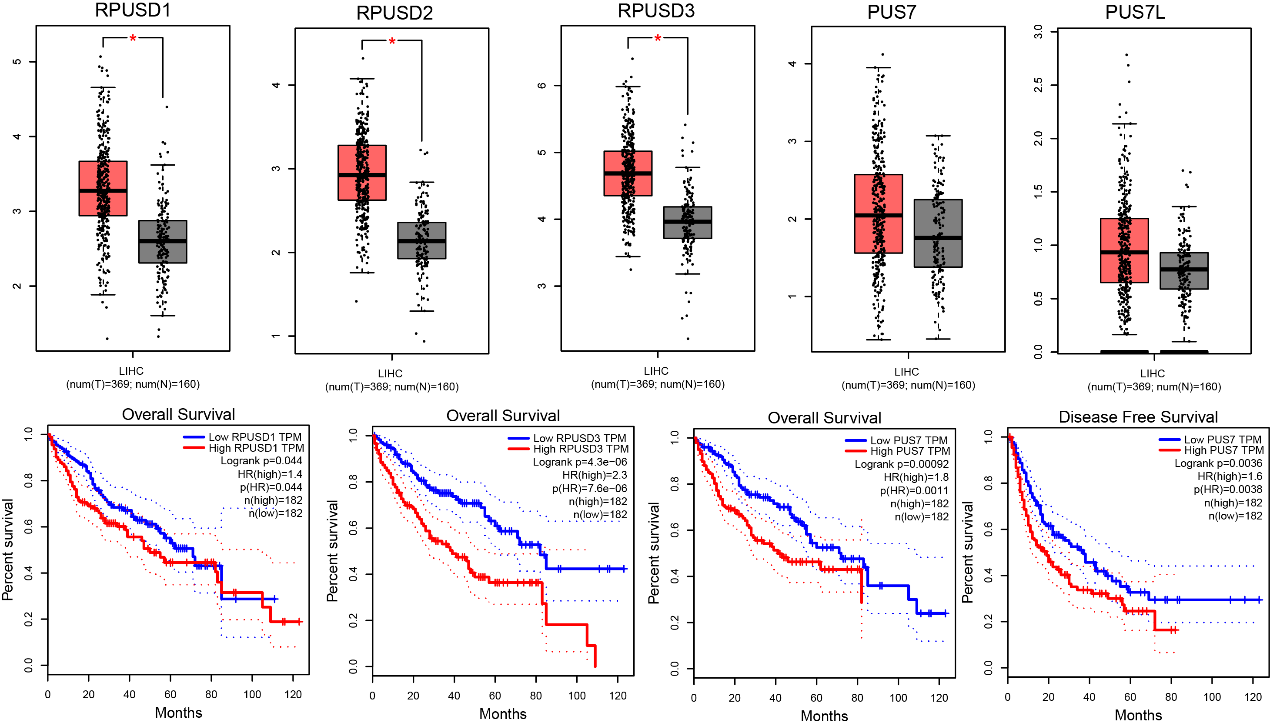


*: p<0.05.

**Figure S2.** **Nomogram of PUS1 and prognosis related variables for predicting 1-, 3- and 5-year events (death) in TCGA cohort.**


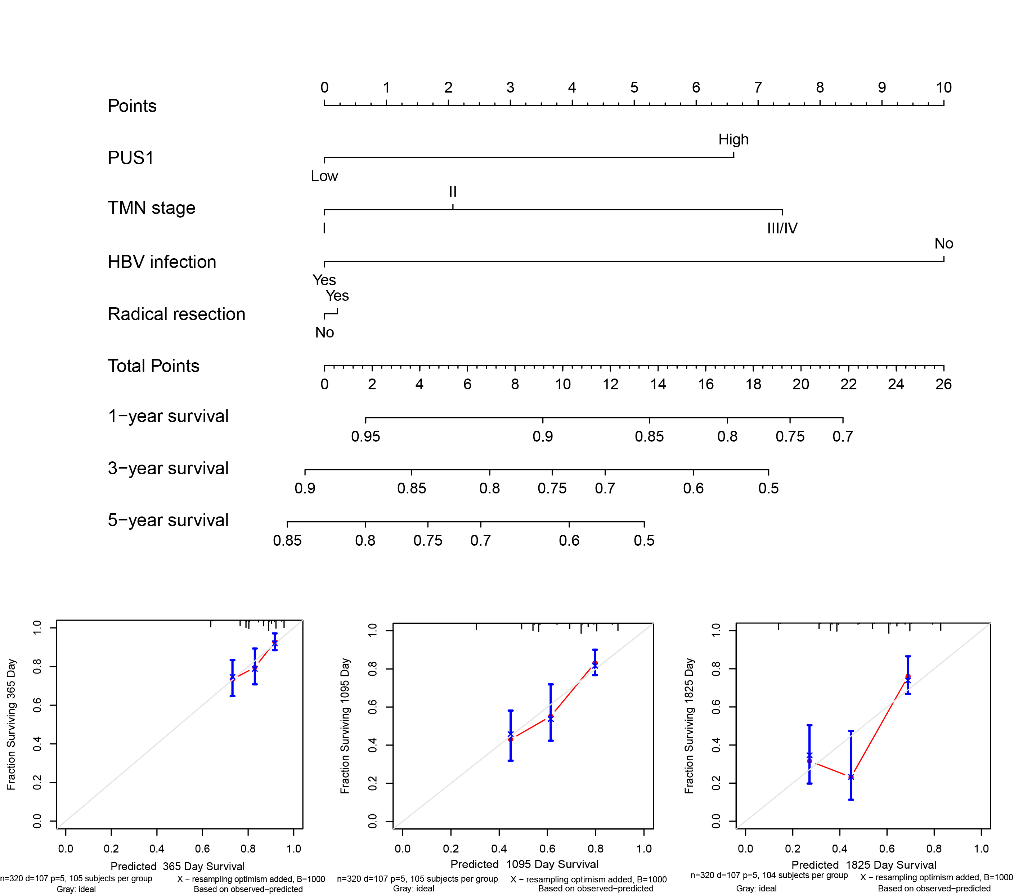


**Figure S3. Nomogram of PUS1 and prognosis related variables for predicting 1-year RFS.**


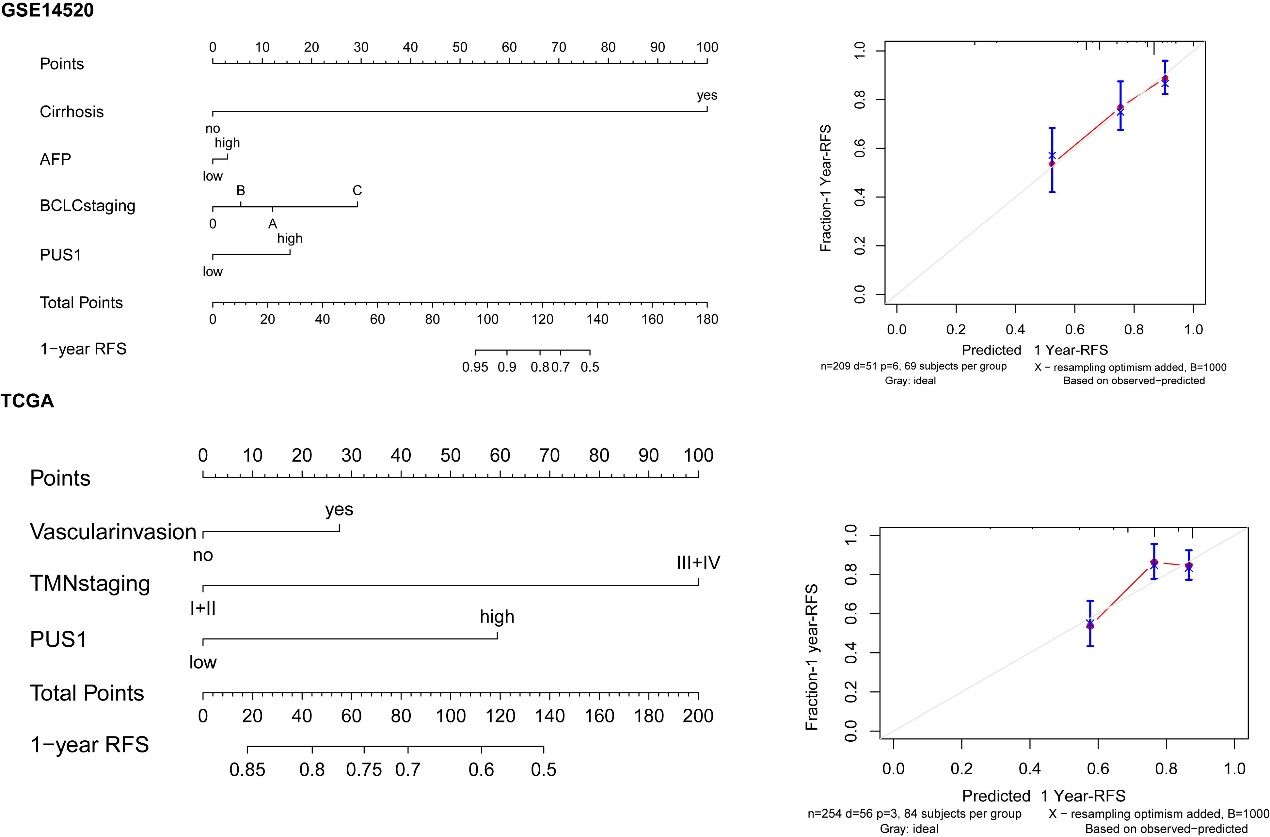


**Figure S4. Risk model of PUS1 in TCGA cohort.**


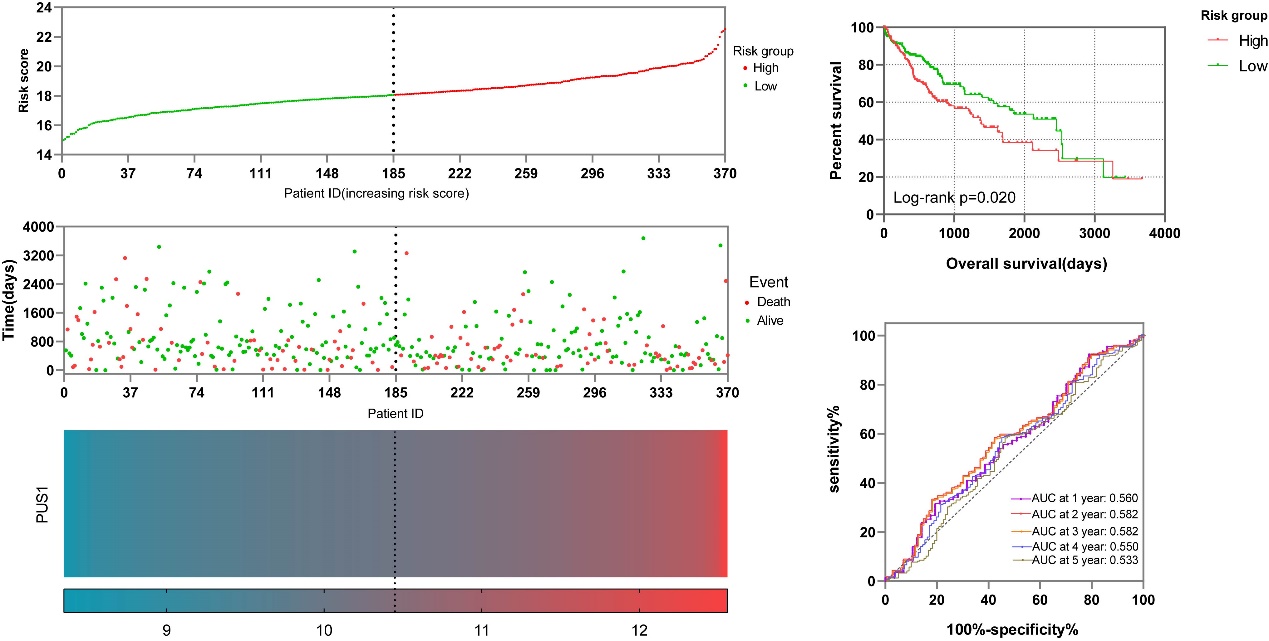

Supplement: Supplementary file 1 [file get_supplementary_file.php]
